# Supplementary material for: Seafloor evidence for pre-shield volcanism above the Tristan da Cunha mantle plume
Source: Springer Nature journal article supplement (doi:10.1038/s41467-020-18361-4), 2020-09-11
Supplement: MOESM1 [file 41467_2020_18361_MOESM1_ESM.pdf]

**Supplementary Information for**  
**Seafloor evidence for pre-shield volcanism above**  
**the Tristan da Cunha mantle plume**  
**by Geissler et al.**

The supplementary material presents figures, tables, notes and references that complement the main manuscript.

Supplementary Figure 1 illustrates seamounts in the Tristan da Cunha area. Supplementary Figure 2 presents seabed backscatter for the complete study area. Supplementary Figure 3 shows unclassified backscatter mosaics of all study areas. Supplementary Figure 4 presents evidence for past slope instability around Tristan da Cunha. Supplementary Figure 5 compares the water depths from our bathymetry data with a global digital elevation model. Supplementary Figure 6 shows the distribution of seabed backscatter. Supplementary Note 1 and Supplementary Figure 7 introduce and discuss aspects of combining seabed backscatter data from different cruises and slightly different sensors in more detail.

All supplementary figures in high resolution, and the digital terrain model, as well as the backscatter mosaic are retrievable from the PANGAEA archive as mentioned in the chapter data availability<sup>1</sup>.

Supplementary Table S1 contains the volume calculations of the distinguished volcanic cones while Supplementary Table 2 displays the decision table to calculate the benthic terrain model.

The supplementary references complete the given information.

## Supplementary Figures

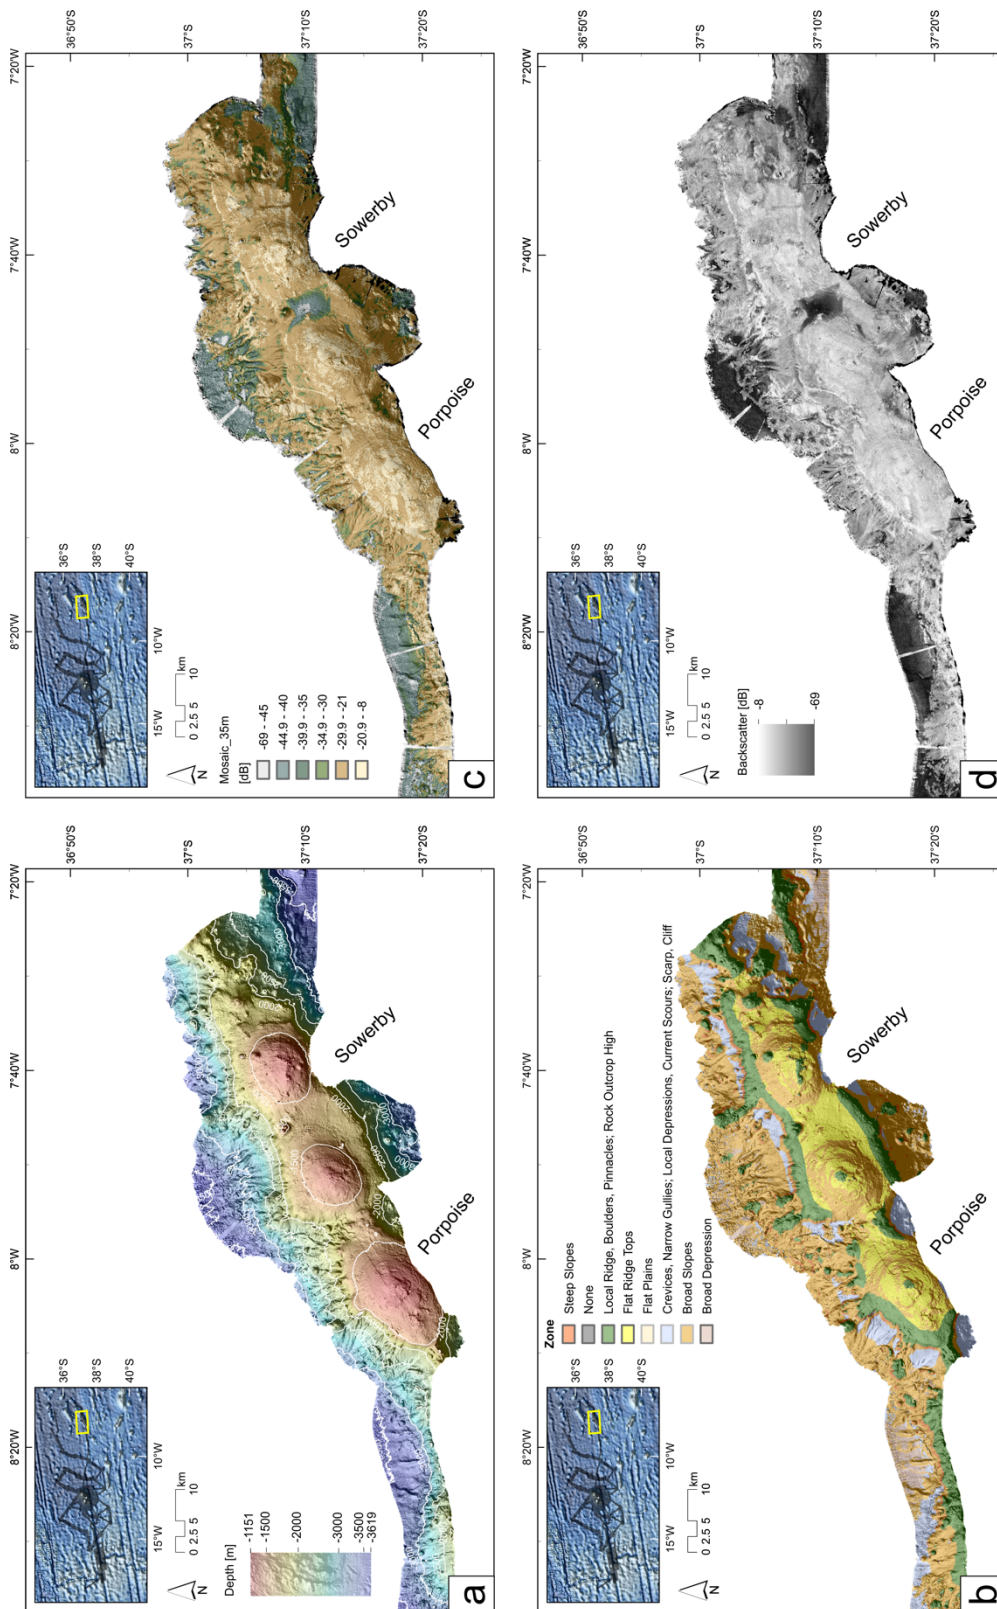

**Supplementary Figure 1 | Seamounts to the east of Tristan da Cunha. (a)** High-resolution bathymetry for seamounts east of Tristan da Cunha. **(b)** Benthic Terrain Model. **(c)** Backscatter intensity classified. Brownish colors show areas with high backscatter amplitudes. **(d)** Backscatter in greyscale (linear) unclassified.

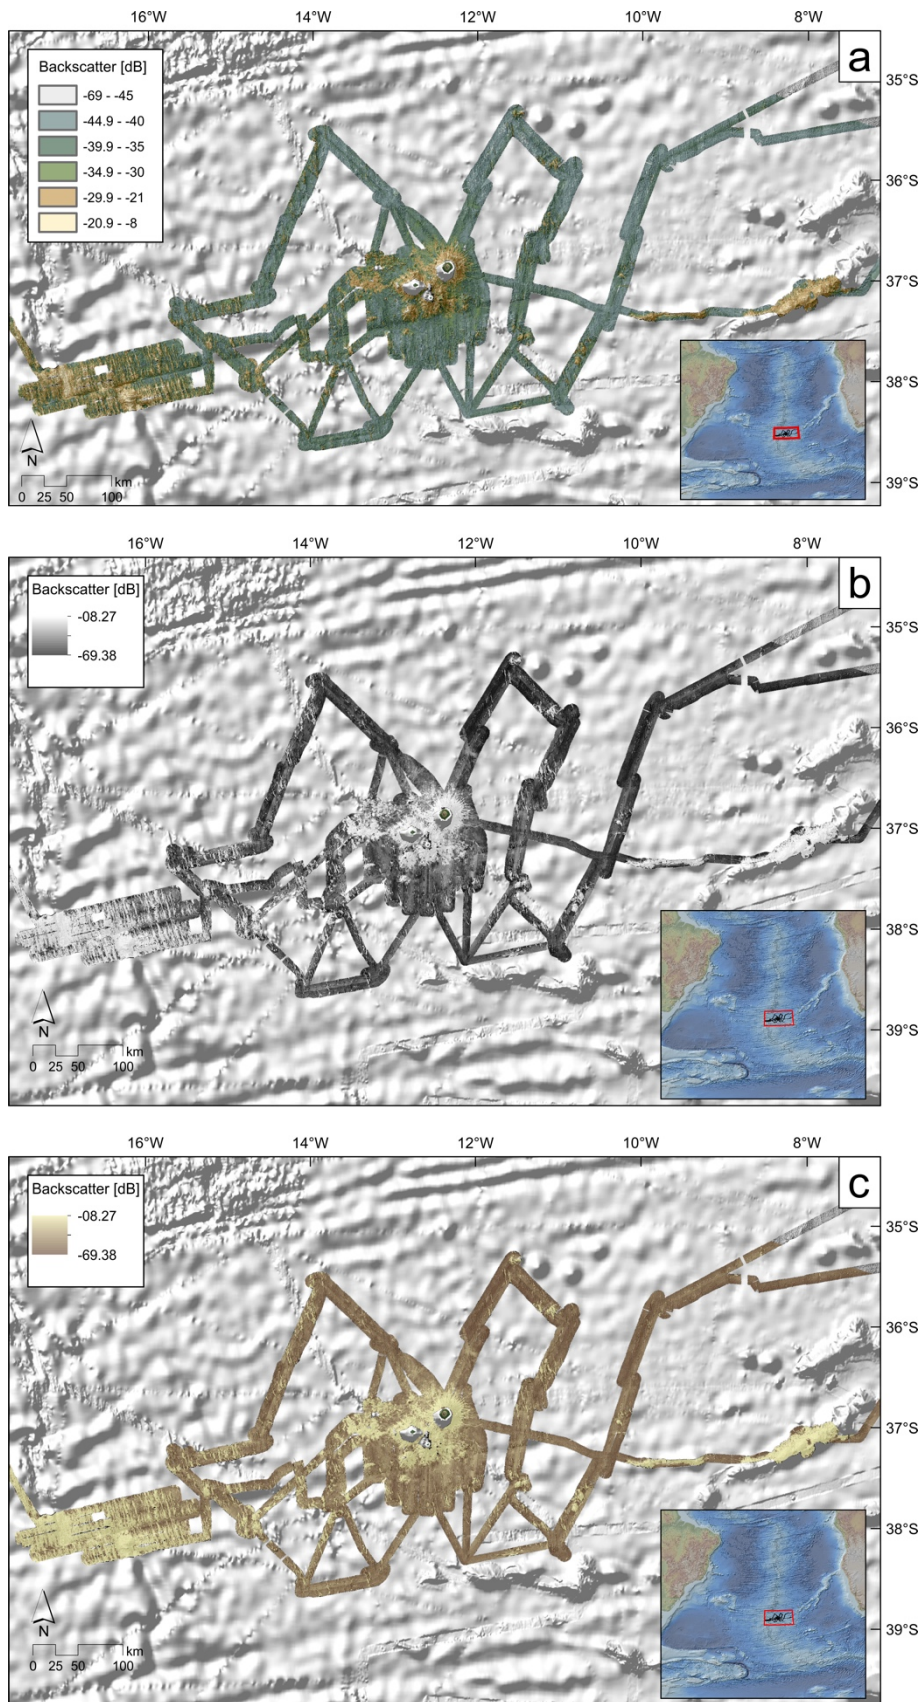

**Supplementary Figure 2 | Backscatter mosaic overview.** Backscatter mosaic overview in (a) colored, classified, (b) linear greyscale unclassified, and (c) linear white-to-brown-scale unclassified.

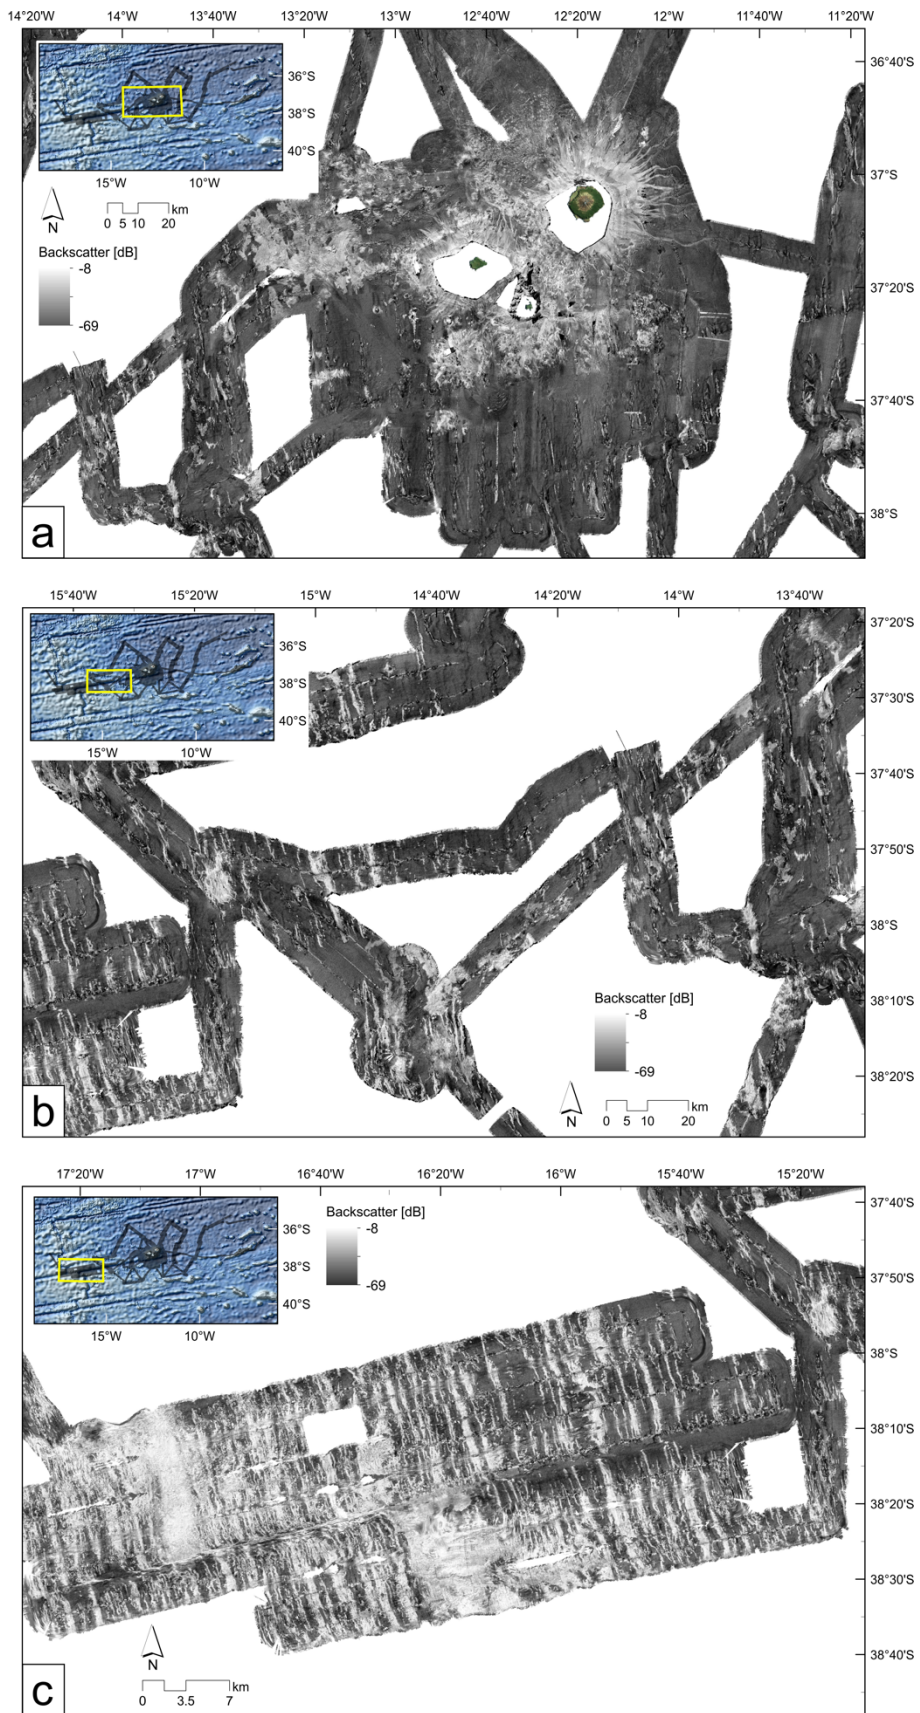

**Supplementary Figure 3 | Unclassified backscatter.** Unclassified backscatter of (a) the central region around Tristan da Cunha; (b) the central west and, (c) the area around the Mid-Atlantic Ridge and the core complex. The greyscale is linear.

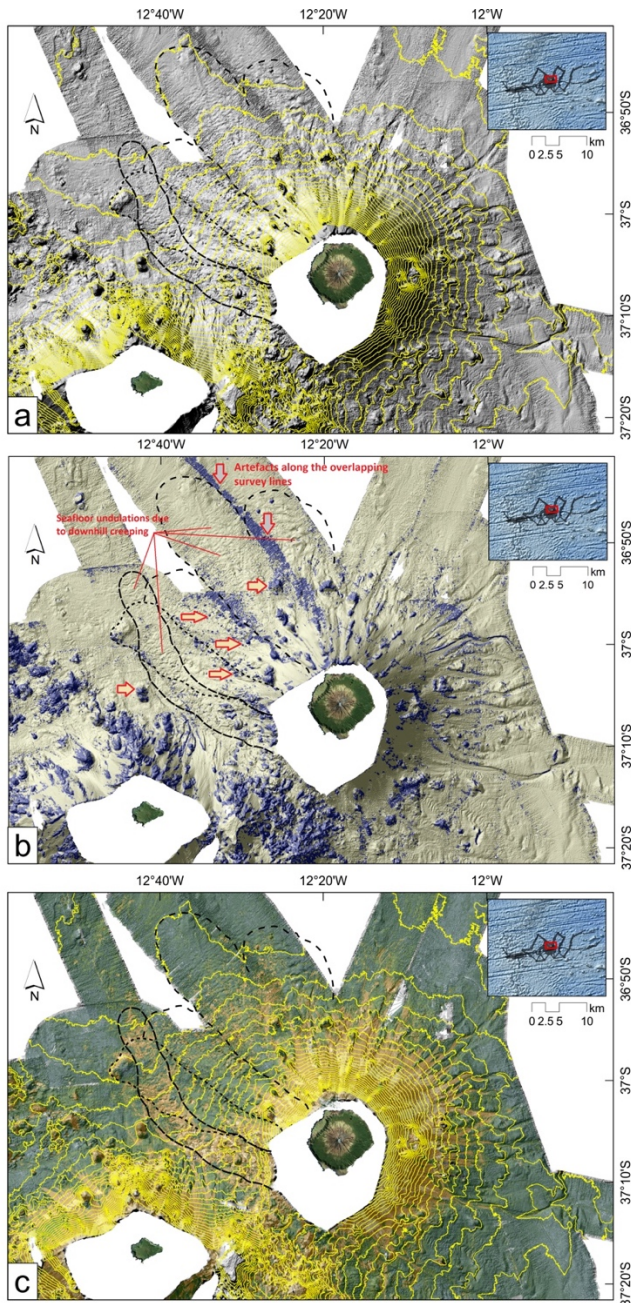

**Supplementary Figure 4 | GIS based analysis of the NW flank of Tristan da Cunha.**

The northern submarine flank of Tristan da Cunha seems to have been affected by numerous mass transport events. It shows several scarps, blocks and lobes that reveal the occurrence of downslope transport by sliding and creep-like processes. The variable backscatter intensity in this area supports the presence of variable thicknesses of sediment drape that imply mass transport occurred in several phases over a long period of time.

(a) Hillshade and depth contour lines around Tristan da Cunha. (b) Drape of the most rugged areas, characterized by volcanic outcrop and the presence of variably-sized boulders (in blue and partly indicated by horizontal arrows) based on the analysis of Surface Area to Planar Area<sup>2</sup>, which computes a ratio between the three-dimensional surface area and the planar area of the surface. (c) Depth contour lines overlain on seabed backscatter intensity. The dashed and solid black lines in all three figures outline different debris avalanche deposits.

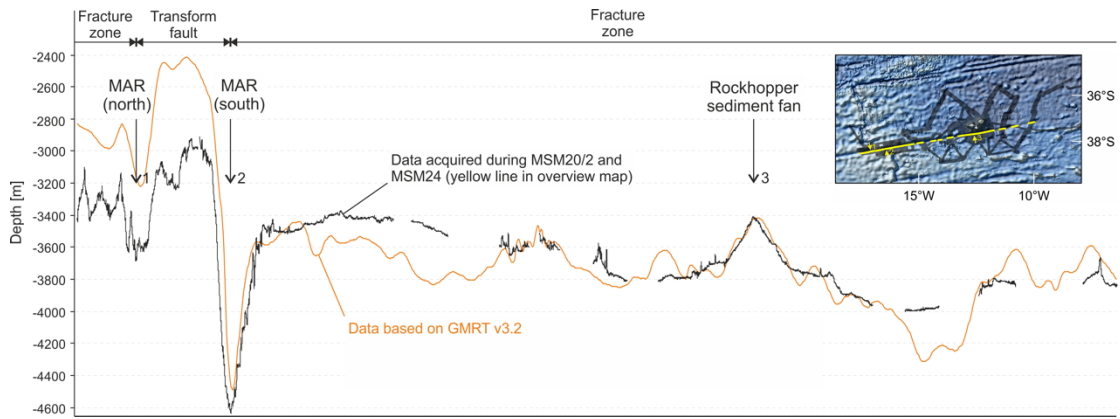

**Supplementary Figure 5 | Water depth along the Tristan da Cunha Transform Fault and Fracture Zone System.** This figure compares the global Digital Elevation Model GMRT<sup>3</sup> and our measured bathymetry along the Tristan da Cunha Transform Fault and Fracture Zone System (TTFZ). The GMRT<sup>3</sup> water depths in the region around Tristan da Cunha are mainly derived from satellite altimetry due to the lack of ship-based bathymetry. Smith and Sandwell<sup>4</sup> stated that they excluded specific areas (i.e. Walvis Ridge) from their determination of bathymetry by inversion of satellite-derived free-air gravity data due to anomalous crustal thicknesses. It therefore seems very likely that some smaller areas of anomalous crustal thickness, such as those in the region of the Tristan da Cunha hot spot, have been treated in insufficient detail for the focus of a regional study such as ours.

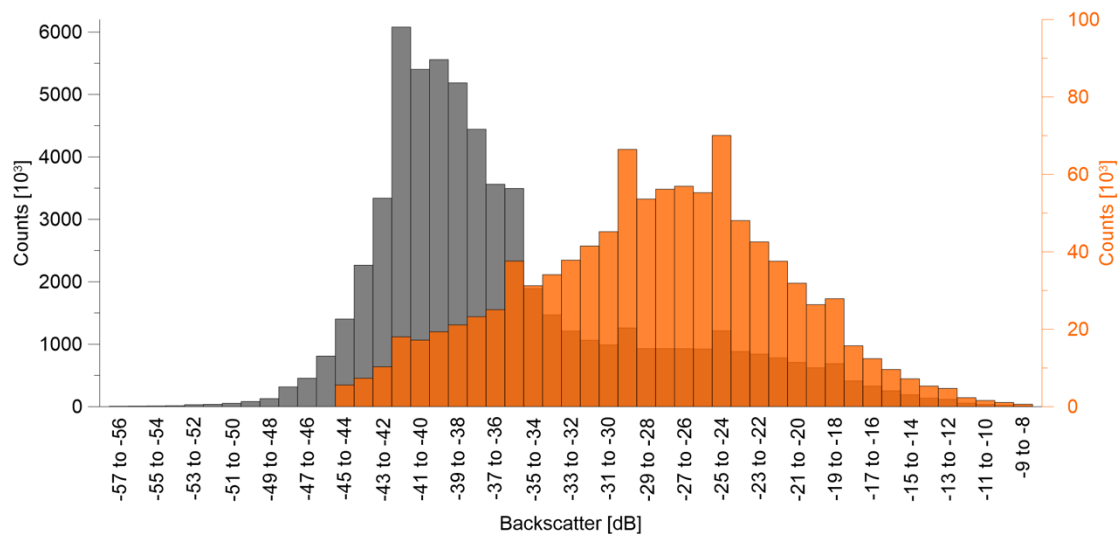

**Supplementary Figure 6 | Seabed backscatter histogram.** Seabed backscatter values of the whole study area (grey color) compared to backscatter values of the mapped volcanic cones (orange). Latter show a higher mean backscatter.

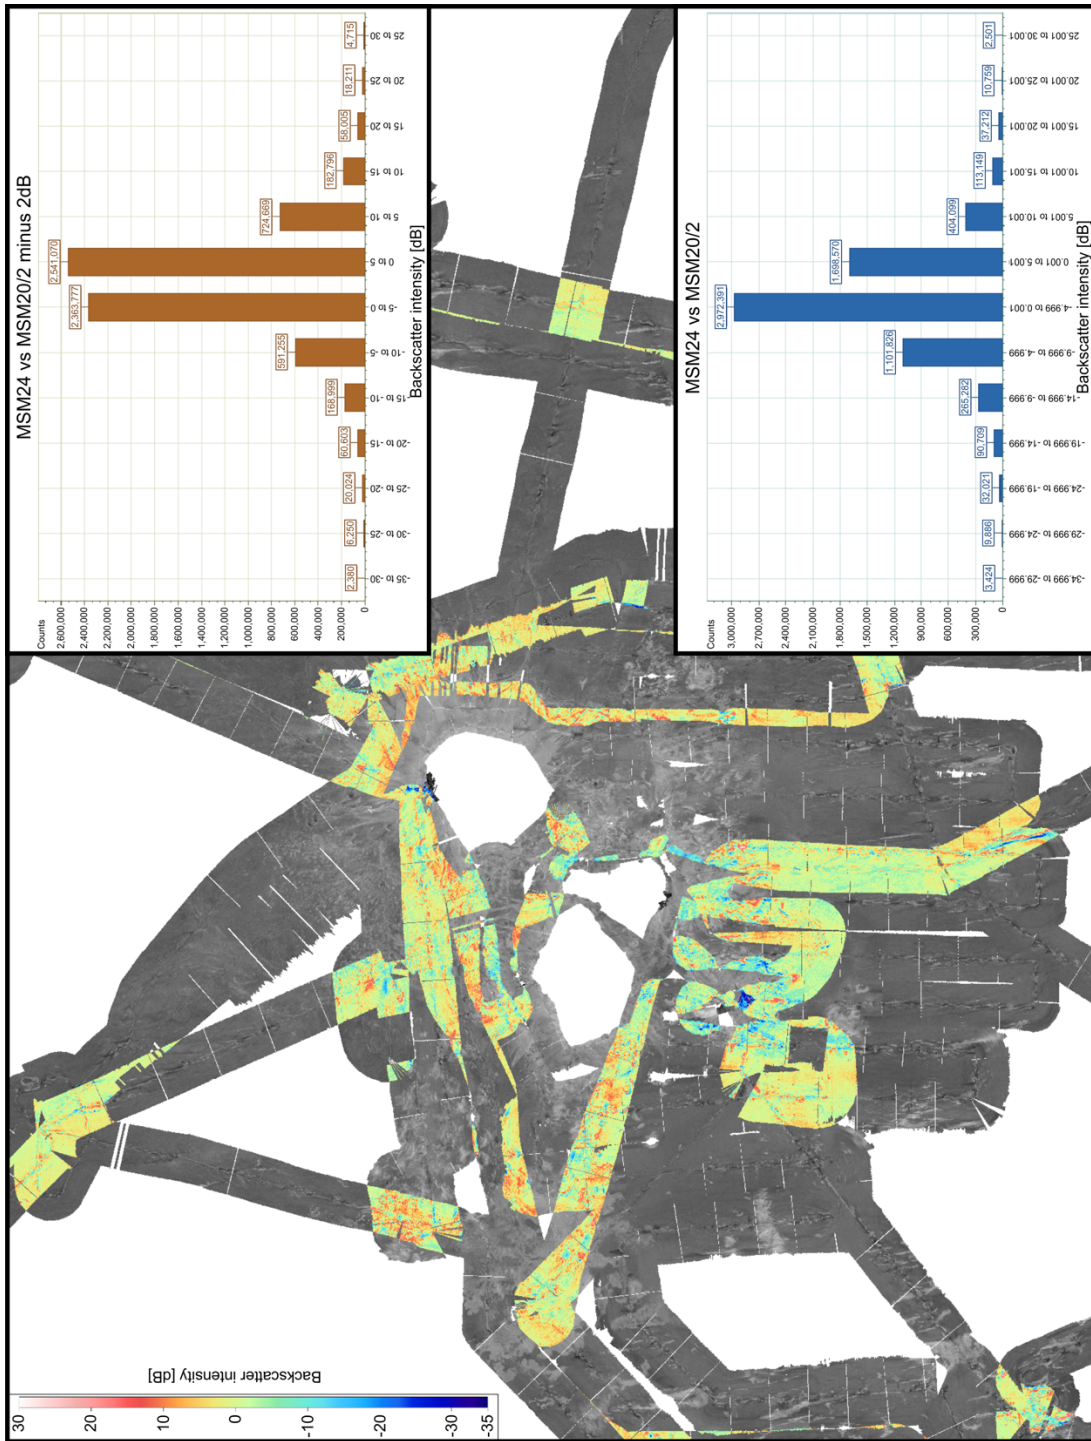

**Supplementary Figure 7 | Combined backscatter mosaic.** Comparison of seabed backscatter of cruises MSM24 and MSM20/2. Overlapping survey areas are colored according to the dB values of the offset-corrected histogram in the upper right corner. The uncorrected histogram is shown in the lower right corner.



## **Supplementary Tables**

**Supplementary Table 1 | Volume calculations of volcanic cones.** Geographical position, backscatter value and describing geomorphological parameters of all mapped volcanic cones. Isolde Smt. (#262) and Rockhopper Smt. (#279) are highlighted in grey.

**Supplementary Table 2 | Decision table.** Decision table summarizing the factors used in the structural Benthic Terrain Model classification (modified after Erdey-Heydorn<sup>5</sup>). The Bathymetric Positioning Index values are given in grid units (standardized value of each data point was multiplied by 100) and represent  $\pm 1$  standard deviation. Slope values are given in degrees. For a better visualization, some of the structural zones are grouped together in the final map.

**Supplementary Table 1:** Volume calculations of volcanic cones. Isolde Smt. (#262) and Rockhopper Smt. (#279) are highlighted in grey.

| #  | Lat<br>[DDD] | Lon<br>[DDD] | Total<br>volume<br>[km <sup>3</sup> ] | Net<br>volume<br>[km <sup>3</sup> ] | Cut<br>volume<br>[km <sup>3</sup> ] | Cut area<br>[km <sup>2</sup> ] | Cut area<br>3D [km <sup>2</sup> ] | Fill<br>volume<br>[km <sup>3</sup> ] | Fill area<br>[km <sup>2</sup> ] | Fill area<br>3D [km <sup>2</sup> ] | Enclosed<br>area<br>[km <sup>2</sup> ] | Peri-<br>meter<br>[km] | Mean<br>diameter<br>[km] | Back-<br>scatter<br>[dB] |
|----|--------------|--------------|---------------------------------------|-------------------------------------|-------------------------------------|--------------------------------|-----------------------------------|--------------------------------------|---------------------------------|------------------------------------|----------------------------------------|------------------------|--------------------------|--------------------------|
| 1  | -37.2413     | -12.3974     | 0.010                                 | <b>0.010</b>                        | 0.010                               | 0.275                          | 0.297                             | 0.00024                              | 0.064                           | 0.067                              | <b>0.340</b>                           | 2.106                  | <b>0.670</b>             | -30.06                   |
| 2  | -37.5981     | -13.0440     | 0.006                                 | <b>0.005</b>                        | 0.006                               | 0.272                          | 0.284                             | 0.00049                              | 0.068                           | 0.070                              | <b>0.340</b>                           | 2.106                  | <b>0.670</b>             | -37.04                   |
| 3  | -37.1545     | -12.9391     | 0.012                                 | <b>0.011</b>                        | 0.011                               | 0.331                          | 0.357                             | 0.00012                              | 0.048                           | 0.049                              | <b>0.380</b>                           | 2.208                  | <b>0.703</b>             | -35.46                   |
| 4  | -37.0146     | -12.4787     | 0.038                                 | <b>0.037</b>                        | 0.037                               | 0.636                          | 0.704                             | 0.00007                              | 0.036                           | 0.037                              | <b>0.673</b>                           | 2.943                  | <b>0.937</b>             | -28.60                   |
| 5  | -37.1472     | -13.0845     | 0.028                                 | <b>0.028</b>                        | 0.028                               | 0.547                          | 0.598                             | 0.00015                              | 0.027                           | 0.029                              | <b>0.576</b>                           | 2.751                  | <b>0.876</b>             | -27.80                   |
| 6  | -37.1871     | -13.1362     | 0.031                                 | <b>0.031</b>                        | 0.031                               | 0.570                          | 0.635                             | 0.00012                              | 0.056                           | 0.057                              | <b>0.626</b>                           | 2.842                  | <b>0.905</b>             | -37.41                   |
| 7  | -37.2112     | -13.2575     | 0.021                                 | <b>0.020</b>                        | 0.020                               | 0.455                          | 0.489                             | 0.00031                              | 0.093                           | 0.095                              | <b>0.548</b>                           | 2.662                  | <b>0.847</b>             | -29.15                   |
| 8  | -37.2085     | -13.2675     | 0.035                                 | <b>0.035</b>                        | 0.035                               | 0.622                          | 0.692                             | 0.00032                              | 0.070                           | 0.072                              | <b>0.693</b>                           | 2.981                  | <b>0.949</b>             | -31.81                   |
| 9  | -36.7823     | -12.4374     | 0.017                                 | <b>0.016</b>                        | 0.017                               | 0.475                          | 0.514                             | 0.00048                              | 0.121                           | 0.122                              | <b>0.597</b>                           | 2.772                  | <b>0.882</b>             | -30.88                   |
| 10 | -36.7994     | -12.4653     | 0.016                                 | <b>0.015</b>                        | 0.016                               | 0.525                          | 0.549                             | 0.00029                              | 0.147                           | 0.148                              | <b>0.673</b>                           | 2.951                  | <b>0.939</b>             | -27.23                   |
| 11 | -36.9862     | -12.4962     | 0.024                                 | <b>0.023</b>                        | 0.024                               | 0.509                          | 0.576                             | 0.00034                              | 0.081                           | 0.084                              | <b>0.591</b>                           | 2.744                  | <b>0.873</b>             | -27.15                   |
| 12 | -37.0515     | -12.5214     | 0.027                                 | <b>0.025</b>                        | 0.026                               | 0.567                          | 0.626                             | 0.00071                              | 0.194                           | 0.199                              | <b>0.762</b>                           | 3.205                  | <b>1.020</b>             | -32.78                   |
| 13 | -37.1876     | -12.5895     | 0.015                                 | <b>0.014</b>                        | 0.015                               | 0.404                          | 0.449                             | 0.00019                              | 0.070                           | 0.074                              | <b>0.474</b>                           | 2.466                  | <b>0.785</b>             | -32.38                   |
| 14 | -37.6317     | -12.8318     | 0.020                                 | <b>0.020</b>                        | 0.020                               | 0.465                          | 0.525                             | 0.00036                              | 0.054                           | 0.061                              | <b>0.519</b>                           | 2.581                  | <b>0.822</b>             | -34.25                   |
| 15 | -37.6473     | -12.9927     | 0.016                                 | <b>0.016</b>                        | 0.016                               | 0.473                          | 0.494                             | 0.00004                              | 0.024                           | 0.025                              | <b>0.498</b>                           | 2.564                  | <b>0.816</b>             | -38.71                   |
| 16 | -37.7073     | -12.8670     | 0.021                                 | <b>0.021</b>                        | 0.021                               | 0.530                          | 0.556                             | 0.00012                              | 0.047                           | 0.047                              | <b>0.578</b>                           | 2.731                  | <b>0.869</b>             | -41.31                   |
| 17 | -37.3528     | -12.3812     | 0.016                                 | <b>0.016</b>                        | 0.016                               | 0.385                          | 0.428                             | 0.00024                              | 0.053                           | 0.056                              | <b>0.439</b>                           | 2.361                  | <b>0.752</b>             | -17.35                   |
| 18 | -37.3474     | -12.3915     | 0.032                                 | <b>0.032</b>                        | 0.032                               | 0.541                          | 0.614                             | 0.00028                              | 0.077                           | 0.081                              | <b>0.619</b>                           | 2.854                  | <b>0.908</b>             | -23.18                   |
| 19 | -37.4790     | -12.2744     | 0.009                                 | <b>0.009</b>                        | 0.009                               | 0.374                          | 0.393                             | 0.00007                              | 0.034                           | 0.035                              | <b>0.409</b>                           | 2.287                  | <b>0.728</b>             | -25.90                   |
| 20 | -37.5445     | -13.1358     | 0.019                                 | <b>0.017</b>                        | 0.018                               | 0.409                          | 0.439                             | 0.00092                              | 0.095                           | 0.099                              | <b>0.504</b>                           | 2.544                  | <b>0.810</b>             | -36.49                   |
| 21 | -37.5508     | -13.0955     | 0.015                                 | <b>0.015</b>                        | 0.015                               | 0.523                          | 0.550                             | 0.00004                              | 0.029                           | 0.030                              | <b>0.553</b>                           | 2.678                  | <b>0.852</b>             | -37.54                   |
| 22 | -37.5417     | -13.0859     | 0.010                                 | <b>0.010</b>                        | 0.010                               | 0.440                          | 0.454                             | 0.00004                              | 0.023                           | 0.023                              | <b>0.464</b>                           | 2.437                  | <b>0.776</b>             | -36.76                   |
| 23 | -37.4886     | -13.0611     | 0.014                                 | <b>0.013</b>                        | 0.014                               | 0.471                          | 0.496                             | 0.00018                              | 0.043                           | 0.045                              | <b>0.515</b>                           | 2.633                  | <b>0.838</b>             | -33.88                   |
| 24 | -37.4748     | -13.1594     | 0.022                                 | <b>0.022</b>                        | 0.022                               | 0.663                          | 0.697                             | 0.00019                              | 0.042                           | 0.044                              | <b>0.706</b>                           | 3.048                  | <b>0.970</b>             | -35.78                   |
| 25 | -37.2732     | -12.5295     | 0.036                                 | <b>0.036</b>                        | 0.036                               | 0.562                          | 0.654                             | 0.00014                              | 0.027                           | 0.030                              | <b>0.590</b>                           | 2.904                  | <b>0.924</b>             | -21.81                   |
| 26 | -37.3365     | -12.0158     | 0.027                                 | <b>0.027</b>                        | 0.027                               | 0.545                          | 0.607                             | 0.00014                              | 0.068                           | 0.069                              | <b>0.614</b>                           | 2.812                  | <b>0.895</b>             | -38.46                   |
| 27 | -37.3667     | -12.9914     | 0.010                                 | <b>0.010</b>                        | 0.010                               | 0.639                          | 0.645                             | 0.00002                              | 0.032                           | 0.032                              | <b>0.672</b>                           | 2.964                  | <b>0.943</b>             | -36.00                   |
| 28 | -36.5445     | -11.0435     | 1.777                                 | <b>1.770</b>                        | 1.773                               | 9.182                          | 10.209                            | 0.00324                              | 0.458                           | 0.492                              | <b>9.676</b>                           | 12.24                  | <b>3.896</b>             | -28.64                   |

Supplementary Table 1 continued..

| #  | Lat<br>[DDD] | Lon<br>[DDD] | Total<br>volume<br>[km <sup>3</sup> ] | Net<br>volume<br>[km <sup>3</sup> ] | Cut<br>volume<br>[km <sup>3</sup> ] | Cut area<br>[km <sup>2</sup> ] | Cut area<br>3D [km <sup>2</sup> ] | Fill<br>volume<br>[km <sup>3</sup> ] | Fill area<br>[km <sup>2</sup> ] | Fill area<br>3D [km <sup>2</sup> ] | Enclosed<br>area<br>[km <sup>2</sup> ] | Peri-<br>meter<br>[km] | Mean<br>diameter<br>[km] | Back-<br>scatter<br>[dB] |
|----|--------------|--------------|---------------------------------------|-------------------------------------|-------------------------------------|--------------------------------|-----------------------------------|--------------------------------------|---------------------------------|------------------------------------|----------------------------------------|------------------------|--------------------------|--------------------------|
| 29 | -36.9710     | -13.1186     | 0.334                                 | <b>0.334</b>                        | 0.334                               | 3.370                          | 4.453                             | 0.00010                              | 0.060                           | 0.062                              | <b>3.883</b>                           | 7.71                   | <b>2.454</b>             | -21.72                   |
| 30 | -36.9896     | -13.1330     | 0.099                                 | <b>0.098</b>                        | 0.098                               | 1.209                          | 1.357                             | 0.00010                              | 0.039                           | 0.042                              | <b>1.249</b>                           | 4.195                  | <b>1.335</b>             | -29.68                   |
| 31 | -36.9880     | -13.2420     | 0.185                                 | <b>0.185</b>                        | 0.185                               | 2.183                          | 2.402                             | 0.00021                              | 0.083                           | 0.085                              | <b>2.269</b>                           | 6.121                  | <b>1.948</b>             | -22.24                   |
| 32 | -36.9730     | -12.4083     | 0.443                                 | <b>0.442</b>                        | 0.442                               | 3.737                          | 4.241                             | 0.00056                              | 0.188                           | 0.194                              | <b>3.932</b>                           | 8.405                  | <b>2.675</b>             | -31.32                   |
| 33 | -37.0031     | -13.2489     | 0.063                                 | <b>0.062</b>                        | 0.063                               | 1.672                          | 1.716                             | 0.00049                              | 0.152                           | 0.155                              | <b>1.826</b>                           | 4.948                  | <b>1.575</b>             | -28.62                   |
| 34 | -37.0048     | -13.1731     | 0.099                                 | <b>0.098</b>                        | 0.099                               | 1.279                          | 1.439                             | 0.00066                              | 0.151                           | 0.160                              | <b>1.432</b>                           | 4.434                  | <b>1.411</b>             | -32.37                   |
| 35 | -36.9891     | -12.3900     | 0.197                                 | <b>0.197</b>                        | 0.197                               | 2.200                          | 2.423                             | 0.00011                              | 0.065                           | 0.067                              | <b>2.269</b>                           | 5.938                  | <b>1.890</b>             | -28.03                   |
| 36 | -37.0199     | -13.2199     | 0.089                                 | <b>0.089</b>                        | 0.089                               | 1.013                          | 1.167                             | 0.00019                              | 0.036                           | 0.041                              | <b>1.050</b>                           | 3.847                  | <b>1.225</b>             | -29.24                   |
| 37 | -37.0095     | -12.4033     | 0.053                                 | <b>0.053</b>                        | 0.053                               | 0.790                          | 0.892                             | 0.00011                              | 0.042                           | 0.044                              | <b>0.834</b>                           | 3.278                  | <b>1.043</b>             | -28.62                   |
| 38 | -37.0517     | -13.1637     | 0.110                                 | <b>0.108</b>                        | 0.109                               | 1.582                          | 1.741                             | 0.00108                              | 0.150                           | 0.162                              | <b>1.734</b>                           | 5.277                  | <b>1.680</b>             | -27.21                   |
| 39 | -37.0362     | -12.4235     | 0.317                                 | <b>0.316</b>                        | 0.316                               | 2.163                          | 2.605                             | 0.00043                              | 0.121                           | 0.126                              | <b>2.289</b>                           | 5.748                  | <b>1.830</b>             | -31.66                   |
| 40 | -37.0991     | -13.0731     | 0.128                                 | <b>0.127</b>                        | 0.127                               | 1.347                          | 1.571                             | 0.00050                              | 0.099                           | 0.105                              | <b>1.449</b>                           | 4.545                  | <b>1.447</b>             | -35.09                   |
| 41 | -37.1071     | -12.4678     | 0.120                                 | <b>0.118</b>                        | 0.119                               | 1.891                          | 1.996                             | 0.00085                              | 0.245                           | 0.252                              | <b>2.140</b>                           | 5.467                  | <b>1.740</b>             | -21.21                   |
| 42 | -37.1390     | -13.0074     | 0.668                                 | <b>0.667</b>                        | 0.668                               | 4.588                          | 5.140                             | 0.00072                              | 0.171                           | 0.179                              | <b>4.766</b>                           | 8.797                  | <b>2.800</b>             | -25.45                   |
| 43 | -37.1472     | -12.7829     | 0.667                                 | <b>0.666</b>                        | 0.666                               | 4.785                          | 5.185                             | 0.00041                              | 0.135                           | 0.140                              | <b>4.927</b>                           | 8.491                  | <b>2.703</b>             | -26.30                   |
| 44 | -37.1502     | -12.4933     | 0.213                                 | <b>0.211</b>                        | 0.212                               | 2.428                          | 2.579                             | 0.00090                              | 0.173                           | 0.179                              | <b>2.606</b>                           | 5.979                  | <b>1.903</b>             | -27.98                   |
| 45 | -37.1766     | -13.3865     | 0.054                                 | <b>0.053</b>                        | 0.054                               | 0.846                          | 0.942                             | 0.00050                              | 0.105                           | 0.109                              | <b>0.952</b>                           | 3.574                  | <b>1.138</b>             | -35.29                   |
| 46 | -37.1786     | -12.9108     | 0.034                                 | <b>0.034</b>                        | 0.034                               | 0.640                          | 0.700                             | 0.00010                              | 0.022                           | 0.023                              | <b>0.663</b>                           | 2.9                    | <b>0.923</b>             | -32.80                   |
| 47 | -37.1857     | -13.4235     | 0.121                                 | <b>0.121</b>                        | 0.121                               | 1.780                          | 1.892                             | 0.00005                              | 0.042                           | 0.043                              | <b>1.824</b>                           | 4.989                  | <b>1.588</b>             | -34.86                   |
| 48 | -37.1946     | -13.3709     | 0.582                                 | <b>0.581</b>                        | 0.581                               | 4.848                          | 5.222                             | 0.00050                              | 0.187                           | 0.192                              | <b>5.042</b>                           | 8.626                  | <b>2.746</b>             | -29.32                   |
| 49 | -37.2220     | -12.4216     | 0.013                                 | <b>0.011</b>                        | 0.012                               | 0.532                          | 0.545                             | 0.00107                              | 0.122                           | 0.131                              | <b>0.655</b>                           | 2.944                  | <b>0.937</b>             | -29.74                   |
| 50 | -37.2504     | -12.3942     | 0.317                                 | <b>0.317</b>                        | 0.317                               | 3.282                          | 3.705                             | 0.00017                              | 0.096                           | 0.100                              | <b>3.385</b>                           | 9.065                  | <b>2.885</b>             | -28.57                   |
| 51 | -37.2818     | -12.2438     | 0.047                                 | <b>0.047</b>                        | 0.047                               | 1.032                          | 1.095                             | 0.00011                              | 0.051                           | 0.052                              | <b>1.085</b>                           | 3.891                  | <b>1.239</b>             | -28.70                   |
| 52 | -37.2970     | -12.3411     | 0.186                                 | <b>0.185</b>                        | 0.185                               | 1.755                          | 2.021                             | 0.00023                              | 0.057                           | 0.060                              | <b>1.815</b>                           | 5.185                  | <b>1.650</b>             | -24.92                   |
| 53 | -37.2998     | -12.1765     | 0.318                                 | <b>0.318</b>                        | 0.318                               | 3.210                          | 3.472                             | 0.00024                              | 0.098                           | 0.101                              | <b>3.315</b>                           | 6.758                  | <b>2.151</b>             | -31.06                   |
| 54 | -37.3052     | -12.0701     | 0.294                                 | <b>0.293</b>                        | 0.293                               | 3.167                          | 3.459                             | 0.00040                              | 0.142                           | 0.146                              | <b>3.317</b>                           | 7.167                  | <b>2.281</b>             | -29.86                   |
| 55 | -37.3517     | -13.2270     | 0.143                                 | <b>0.143</b>                        | 0.143                               | 1.793                          | 1.949                             | 0.00030                              | 0.098                           | 0.101                              | <b>1.894</b>                           | 4.968                  | <b>1.581</b>             | -26.43                   |
| 56 | -37.3498     | -12.1991     | 0.072                                 | <b>0.071</b>                        | 0.072                               | 2.184                          | 2.218                             | 0.00016                              | 0.074                           | 0.075                              | <b>2.263</b>                           | 5.854                  | <b>1.863</b>             | -32.60                   |

Supplementary Table 1 continued..

| #  | Lat<br>[DDD] | Lon<br>[DDD] | Total<br>volume<br>[km <sup>3</sup> ] | Net<br>volume<br>[km <sup>3</sup> ] | Cut<br>volume<br>[km <sup>3</sup> ] | Cut area<br>[km <sup>2</sup> ] | Cut area<br>3D [km <sup>2</sup> ] | Fill<br>volume<br>[km <sup>3</sup> ] | Fill area<br>[km <sup>2</sup> ] | Fill area<br>3D [km <sup>2</sup> ] | Enclosed<br>area<br>[km <sup>2</sup> ] | Peri-<br>meter<br>[km] | Mean<br>diameter<br>[km] | Back-<br>scatter<br>[dB] |
|----|--------------|--------------|---------------------------------------|-------------------------------------|-------------------------------------|--------------------------------|-----------------------------------|--------------------------------------|---------------------------------|------------------------------------|----------------------------------------|------------------------|--------------------------|--------------------------|
| 57 | -37.3680     | -12.1575     | 0.043                                 | <b>0.043</b>                        | 0.043                               | 0.849                          | 0.906                             | 0.00010                              | 0.035                           | 0.036                              | <b>0.886</b>                           | 3.429                  | <b>1.091</b>             | -30.05                   |
| 58 | -37.3969     | -13.2295     | 0.057                                 | <b>0.056</b>                        | 0.056                               | 1.068                          | 1.150                             | 0.00039                              | 0.097                           | 0.099                              | <b>1.167</b>                           | 3.934                  | <b>1.252</b>             | -29.78                   |
| 59 | -37.3776     | -12.0790     | 0.238                                 | <b>0.237</b>                        | 0.237                               | 2.425                          | 2.699                             | 0.00052                              | 0.111                           | 0.119                              | <b>2.542</b>                           | 6.321                  | <b>2.012</b>             | -30.35                   |
| 60 | -37.3824     | -12.0379     | 0.199                                 | <b>0.198</b>                        | 0.198                               | 1.683                          | 2.005                             | 0.00054                              | 0.095                           | 0.108                              | <b>1.782</b>                           | 4.867                  | <b>1.549</b>             | -26.04                   |
| 61 | -37.3840     | -12.1187     | 0.355                                 | <b>0.355</b>                        | 0.355                               | 3.566                          | 3.835                             | 0.00020                              | 0.111                           | 0.112                              | <b>3.685</b>                           | 7.243                  | <b>2.306</b>             | -35.68                   |
| 62 | -37.4007     | -12.1651     | 0.524                                 | <b>0.522</b>                        | 0.523                               | 4.580                          | 5.008                             | 0.00082                              | 0.196                           | 0.203                              | <b>4.786</b>                           | 8.482                  | <b>2.700</b>             | -30.63                   |
| 63 | -37.4354     | -13.2500     | 0.662                                 | <b>0.661</b>                        | 0.661                               | 5.289                          | 5.805                             | 0.00062                              | 0.179                           | 0.184                              | <b>5.476</b>                           | 8.782                  | <b>2.795</b>             | -33.32                   |
| 64 | -37.4462     | -12.6636     | 0.509                                 | <b>0.508</b>                        | 0.509                               | 3.982                          | 4.438                             | 0.00050                              | 0.151                           | 0.158                              | <b>4.141</b>                           | 8.204                  | <b>2.611</b>             | -28.00                   |
| 65 | -37.4576     | -12.9381     | 0.163                                 | <b>0.162</b>                        | 0.162                               | 1.934                          | 2.112                             | 0.00075                              | 0.098                           | 0.105                              | <b>2.035</b>                           | 5.452                  | <b>1.735</b>             | -32.52                   |
| 66 | -37.4602     | -12.9163     | 0.153                                 | <b>0.151</b>                        | 0.152                               | 1.797                          | 5.169                             | 0.00082                              | 0.115                           | 0.299                              | <b>2.052</b>                           | 5.425                  | <b>1.727</b>             | -23.62                   |
| 67 | -37.5326     | -12.8931     | 0.171                                 | <b>0.166</b>                        | 0.169                               | 2.598                          | 2.739                             | 0.00221                              | 0.223                           | 0.239                              | <b>2.826</b>                           | 6.639                  | <b>2.113</b>             | -34.93                   |
| 68 | -37.6133     | -12.5588     | 0.424                                 | <b>0.423</b>                        | 0.423                               | 3.331                          | 3.714                             | 0.00055                              | 0.171                           | 0.179                              | <b>3.509</b>                           | 7.445                  | <b>2.370</b>             | -29.83                   |
| 69 | -37.7509     | -13.6063     | 0.130                                 | <b>0.115</b>                        | 0.123                               | 1.877                          | 2.024                             | 0.00768                              | 0.489                           | 0.526                              | <b>2.369</b>                           | 5.601                  | <b>1.783</b>             | -34.67                   |
| 70 | -37.7501     | -13.5965     | 0.079                                 | <b>0.076</b>                        | 0.078                               | 1.428                          | 1.562                             | 0.00164                              | 0.181                           | 0.197                              | <b>1.610</b>                           | 5.766                  | <b>1.835</b>             | -35.37                   |
| 71 | -38.0884     | -14.4732     | 0.654                                 | <b>0.647</b>                        | 0.650                               | 5.402                          | 5.765                             | 0.00362                              | 0.247                           | 0.284                              | <b>5.655</b>                           | 8.513                  | <b>2.710</b>             | -20.17                   |
| 72 | -38.3217     | -14.5792     | 1.225                                 | <b>1.207</b>                        | 1.216                               | 6.685                          | 7.622                             | 0.00907                              | 0.539                           | 0.599                              | <b>7.231</b>                           | 9.692                  | <b>3.085</b>             | -27.36                   |
| 73 | -38.2029     | -14.7699     | 0.451                                 | <b>0.451</b>                        | 0.451                               | 3.077                          | 3.539                             | 0.00026                              | 0.066                           | 0.070                              | <b>3.146</b>                           | 6.391                  | <b>2.034</b>             | -24.88                   |
| 74 | -36.8623     | -13.1645     | 0.207                                 | <b>0.206</b>                        | 0.207                               | 2.760                          | 2.961                             | 0.00044                              | 0.109                           | 0.113                              | <b>2.872</b>                           | 6.047                  | <b>1.925</b>             | -37.30                   |
| 75 | -36.8446     | -13.1705     | 0.021                                 | <b>0.020</b>                        | 0.021                               | 0.645                          | 0.669                             | 0.00063                              | 0.117                           | 0.120                              | <b>0.763</b>                           | 3.112                  | <b>0.991</b>             | -37.24                   |
| 76 | -36.8742     | -13.2169     | 0.071                                 | <b>0.070</b>                        | 0.071                               | 1.369                          | 1.443                             | 0.00030                              | 0.070                           | 0.072                              | <b>1.440</b>                           | 4.422                  | <b>1.408</b>             | -32.38                   |
| 77 | -36.9235     | -13.1462     | 0.085                                 | <b>0.084</b>                        | 0.084                               | 1.661                          | 1.737                             | 0.00022                              | 0.061                           | 0.064                              | <b>1.725</b>                           | 5.142                  | <b>1.637</b>             | -36.49                   |
| 78 | -36.9123     | -13.1767     | 0.060                                 | <b>0.060</b>                        | 0.060                               | 1.576                          | 1.611                             | 0.00002                              | 0.030                           | 0.030                              | <b>1.608</b>                           | 4.638                  | <b>1.476</b>             | -37.02                   |
| 79 | -37.0261     | -13.3037     | 0.260                                 | <b>0.252</b>                        | 0.256                               | 2.715                          | 3.856                             | 0.00382                              | 0.314                           | 0.333                              | <b>3.052</b>                           | 6.261                  | <b>1.993</b>             | -22.63                   |
| 80 | -37.0069     | -13.2869     | 0.243                                 | <b>0.243</b>                        | 0.243                               | 2.181                          | 2.435                             | 0.00017                              | 0.044                           | 0.047                              | <b>2.227</b>                           | 5.362                  | <b>1.707</b>             | -24.25                   |
| 81 | -37.0169     | -13.1983     | 0.425                                 | <b>0.417</b>                        | 0.421                               | 3.235                          | 3.640                             | 0.00402                              | 0.343                           | 0.361                              | <b>3.582</b>                           | 6.773                  | <b>2.156</b>             | -25.86                   |
| 82 | -37.0230     | -13.1824     | 0.154                                 | <b>0.150</b>                        | 0.152                               | 1.947                          | 2.172                             | 0.00219                              | 0.271                           | 0.291                              | <b>2.221</b>                           | 5.398                  | <b>1.718</b>             | -26.90                   |
| 83 | -37.1498     | -12.9664     | 0.406                                 | <b>0.397</b>                        | 0.401                               | 3.094                          | 3.483                             | 0.00452                              | 0.361                           | 0.379                              | <b>3.460</b>                           | 6.677                  | <b>2.125</b>             | -29.08                   |
| 84 | -37.1515     | -12.9504     | 0.147                                 | <b>0.140</b>                        | 0.144                               | 1.580                          | 1.755                             | 0.00331                              | 0.319                           | 0.339                              | <b>1.902</b>                           | 5.16                   | <b>1.642</b>             | -31.37                   |

Supplementary Table 1 continued..

| #   | Lat<br>[DDD] | Lon<br>[DDD] | Total<br>volume<br>[km <sup>3</sup> ] | Net<br>volume<br>[km <sup>3</sup> ] | Cut<br>volume<br>[km <sup>3</sup> ] | Cut area<br>[km <sup>2</sup> ] | Cut area<br>3D [km <sup>2</sup> ] | Fill<br>volume<br>[km <sup>3</sup> ] | Fill area<br>[km <sup>2</sup> ] | Fill area<br>3D [km <sup>2</sup> ] | Enclosed<br>area<br>[km <sup>2</sup> ] | Peri-<br>meter<br>[km] | Mean<br>diameter<br>[km] | Back-<br>scatter<br>[dB] |
|-----|--------------|--------------|---------------------------------------|-------------------------------------|-------------------------------------|--------------------------------|-----------------------------------|--------------------------------------|---------------------------------|------------------------------------|----------------------------------------|------------------------|--------------------------|--------------------------|
| 85  | -37.1488     | -12.9352     | 0.023                                 | <b>0.023</b>                        | 0.023                               | 0.548                          | 0.588                             | 0.00015                              | 0.066                           | 0.067                              | <b>0.615</b>                           | 2.805                  | <b>0.893</b>             | -35.22                   |
| 86  | -37.2117     | -12.8050     | 1.493                                 | <b>1.492</b>                        | 1.492                               | 6.989                          | 8.113                             | 0.00035                              | 0.109                           | 0.116                              | <b>7.110</b>                           | 9.597                  | <b>3.055</b>             | -23.49                   |
| 87  | -37.0983     | -12.6937     | 0.384                                 | <b>0.382</b>                        | 0.383                               | 3.250                          | 3.696                             | 0.00136                              | 0.281                           | 0.293                              | <b>3.538</b>                           | 6.778                  | <b>2.158</b>             | -27.32                   |
| 88  | -37.1113     | -12.6909     | 0.147                                 | <b>0.141</b>                        | 0.144                               | 1.992                          | 2.174                             | 0.00342                              | 0.451                           | 0.478                              | <b>2.448</b>                           | 5.813                  | <b>1.850</b>             | -30.00                   |
| 89  | -36.9972     | -12.7307     | 0.170                                 | <b>0.169</b>                        | 0.169                               | 4.642                          | 4.678                             | 0.00066                              | 0.167                           | 0.169                              | <b>4.817</b>                           | 7.87                   | <b>2.505</b>             | -34.65                   |
| 90  | -37.0109     | -12.7466     | 0.135                                 | <b>0.134</b>                        | 0.134                               | 2.917                          | 2.992                             | 0.00028                              | 0.094                           | 0.097                              | <b>3.015</b>                           | 6.231                  | <b>1.983</b>             | -31.64                   |
| 91  | -36.9217     | -12.4223     | 0.363                                 | <b>0.362</b>                        | 0.362                               | 3.857                          | 4.079                             | 0.00070                              | 0.213                           | 0.219                              | <b>4.077</b>                           | 7.803                  | <b>2.484</b>             | -29.61                   |
| 92  | -37.0762     | -12.4330     | 0.285                                 | <b>0.271</b>                        | 0.278                               | 3.103                          | 3.420                             | 0.00675                              | 0.451                           | 0.481                              | <b>3.561</b>                           | 6.796                  | <b>2.163</b>             | -26.19                   |
| 93  | -37.0614     | -12.4356     | 0.154                                 | <b>0.151</b>                        | 0.152                               | 2.565                          | 2.826                             | 0.00145                              | 0.162                           | 0.179                              | <b>2.732</b>                           | 6.167                  | <b>1.963</b>             | -23.53                   |
| 94  | -36.8996     | -12.2314     | 0.026                                 | <b>0.026</b>                        | 0.026                               | 0.646                          | 0.690                             | 0.00024                              | 0.091                           | 0.092                              | <b>0.738</b>                           | 3.059                  | <b>0.974</b>             | -28.18                   |
| 95  | -36.9409     | -12.2646     | 0.376                                 | <b>0.375</b>                        | 0.376                               | 3.696                          | 3.988                             | 0.00011                              | 0.074                           | 0.078                              | <b>3.778</b>                           | 7.403                  | <b>2.356</b>             | -29.75                   |
| 96  | -36.9630     | -12.2704     | 0.062                                 | <b>0.061</b>                        | 0.061                               | 0.889                          | 1.009                             | 0.00038                              | 0.072                           | 0.074                              | <b>0.962</b>                           | 3.544                  | <b>1.128</b>             | -24.36                   |
| 97  | -36.9253     | -12.3307     | 0.051                                 | <b>0.051</b>                        | 0.051                               | 0.924                          | 1.029                             | 0.00030                              | 0.117                           | 0.122                              | <b>1.044</b>                           | 3.654                  | <b>1.163</b>             | -35.74                   |
| 98  | -37.0902     | -12.8370     | 0.774                                 | <b>0.772</b>                        | 0.773                               | 5.338                          | 6.028                             | 0.00105                              | 0.164                           | 0.171                              | <b>5.512</b>                           | 9.133                  | <b>2.907</b>             | -28.07                   |
| 99  | -37.1157     | -12.8707     | 0.386                                 | <b>0.381</b>                        | 0.383                               | 3.287                          | 3.638                             | 0.00258                              | 0.269                           | 0.290                              | <b>3.562</b>                           | 7.176                  | <b>2.284</b>             | -28.67                   |
| 100 | -37.0713     | -12.8997     | 0.217                                 | <b>0.215</b>                        | 0.216                               | 2.132                          | 2.428                             | 0.00064                              | 0.096                           | 0.103                              | <b>2.232</b>                           | 5.726                  | <b>1.823</b>             | -26.94                   |
| 101 | -37.0988     | -12.9362     | 0.114                                 | <b>0.111</b>                        | 0.112                               | 1.959                          | 2.061                             | 0.00137                              | 0.185                           | 0.191                              | <b>2.148</b>                           | 5.236                  | <b>1.667</b>             | -32.59                   |
| 102 | -37.1057     | -12.9260     | 0.079                                 | <b>0.076</b>                        | 0.077                               | 1.577                          | 1.655                             | 0.00174                              | 0.277                           | 0.286                              | <b>1.857</b>                           | 4.964                  | <b>1.580</b>             | -33.24                   |
| 103 | -37.1054     | -12.9493     | 0.160                                 | <b>0.159</b>                        | 0.159                               | 1.866                          | 2.055                             | 0.00080                              | 0.153                           | 0.159                              | <b>2.022</b>                           | 5.222                  | <b>1.662</b>             | -29.00                   |
| 104 | -37.1235     | -12.9830     | 0.391                                 | <b>0.387</b>                        | 0.389                               | 3.528                          | 3.959                             | 0.00195                              | 0.314                           | 0.337                              | <b>3.847</b>                           | 7.064                  | <b>2.249</b>             | -25.56                   |
| 105 | -37.1263     | -12.9704     | 0.049                                 | <b>0.045</b>                        | 0.047                               | 0.866                          | 0.957                             | 0.00168                              | 0.182                           | 0.202                              | <b>1.049</b>                           | 3.693                  | <b>1.176</b>             | -32.74                   |
| 106 | -37.1545     | -13.0561     | 0.414                                 | <b>0.412</b>                        | 0.413                               | 2.820                          | 3.195                             | 0.00099                              | 0.118                           | 0.124                              | <b>2.943</b>                           | 6.182                  | <b>1.968</b>             | -29.01                   |
| 107 | -37.1579     | -13.0946     | 0.478                                 | <b>0.477</b>                        | 0.477                               | 3.477                          | 3.890                             | 0.00041                              | 0.083                           | 0.089                              | <b>3.565</b>                           | 6.946                  | <b>2.211</b>             | -31.10                   |
| 108 | -37.1946     | -13.1063     | 0.072                                 | <b>0.071</b>                        | 0.071                               | 1.124                          | 1.242                             | 0.00019                              | 0.052                           | 0.056                              | <b>1.178</b>                           | 3.89                   | <b>1.238</b>             | -36.15                   |
| 109 | -37.1910     | -13.1181     | 0.056                                 | <b>0.055</b>                        | 0.056                               | 0.793                          | 0.919                             | 0.00059                              | 0.102                           | 0.113                              | <b>0.896</b>                           | 3.402                  | <b>1.083</b>             | -37.70                   |
| 110 | -37.1695     | -13.1475     | 0.082                                 | <b>0.082</b>                        | 0.082                               | 1.112                          | 1.253                             | 0.00039                              | 0.062                           | 0.068                              | <b>1.176</b>                           | 3.927                  | <b>1.250</b>             | -34.31                   |
| 111 | -37.1781     | -13.1538     | 0.076                                 | <b>0.076</b>                        | 0.076                               | 0.966                          | 1.093                             | 0.00038                              | 0.085                           | 0.088                              | <b>1.052</b>                           | 3.674                  | <b>1.169</b>             | -32.04                   |
| 112 | -37.2085     | -13.2437     | 0.123                                 | <b>0.122</b>                        | 0.122                               | 1.392                          | 1.542                             | 0.00018                              | 0.067                           | 0.069                              | <b>1.461</b>                           | 4.404                  | <b>1.402</b>             | -32.75                   |

Supplementary Table 1 continued..

| #   | Lat<br>[DDD] | Lon<br>[DDD] | Total<br>volume<br>[km <sup>3</sup> ] | Net<br>volume<br>[km <sup>3</sup> ] | Cut<br>volume<br>[km <sup>3</sup> ] | Cut area<br>[km <sup>2</sup> ] | Cut area<br>3D [km <sup>2</sup> ] | Fill<br>volume<br>[km <sup>3</sup> ] | Fill area<br>[km <sup>2</sup> ] | Fill area<br>3D [km <sup>2</sup> ] | Enclosed<br>area<br>[km <sup>2</sup> ] | Peri-<br>meter<br>[km] | Mean<br>diameter<br>[km] | Back-<br>scatter<br>[dB] |
|-----|--------------|--------------|---------------------------------------|-------------------------------------|-------------------------------------|--------------------------------|-----------------------------------|--------------------------------------|---------------------------------|------------------------------------|----------------------------------------|------------------------|--------------------------|--------------------------|
| 113 | -37.2139     | -13.2287     | 0.139                                 | <b>0.138</b>                        | 0.138                               | 1.467                          | 1.669                             | 0.00052                              | 0.101                           | 0.106                              | <b>1.570</b>                           | 4.489                  | <b>1.429</b>             | -36.84                   |
| 114 | -37.2140     | -13.2764     | 0.091                                 | <b>0.090</b>                        | 0.090                               | 1.340                          | 1.445                             | 0.00050                              | 0.112                           | 0.115                              | <b>1.454</b>                           | 4.33                   | <b>1.378</b>             | -32.96                   |
| 115 | -37.2156     | -13.2899     | 0.033                                 | <b>0.033</b>                        | 0.033                               | 0.904                          | 0.930                             | 0.00025                              | 0.069                           | 0.070                              | <b>0.975</b>                           | 3.509                  | <b>1.117</b>             | -30.80                   |
| 116 | -37.2059     | -13.3313     | 0.131                                 | <b>0.130</b>                        | 0.130                               | 1.584                          | 1.729                             | 0.00035                              | 0.074                           | 0.077                              | <b>1.659</b>                           | 4.609                  | <b>1.467</b>             | -27.23                   |
| 117 | -37.1752     | -13.3312     | 0.318                                 | <b>0.316</b>                        | 0.317                               | 3.021                          | 3.310                             | 0.00099                              | 0.133                           | 0.148                              | <b>3.158</b>                           | 6.681                  | <b>2.127</b>             | -31.99                   |
| 118 | -37.2587     | -13.3604     | 0.214                                 | <b>0.210</b>                        | 0.212                               | 2.502                          | 2.677                             | 0.00180                              | 0.338                           | 0.342                              | <b>2.843</b>                           | 6.008                  | <b>1.912</b>             | -29.63                   |
| 119 | -37.2628     | -13.3783     | 0.134                                 | <b>0.133</b>                        | 0.133                               | 1.473                          | 1.647                             | 0.00048                              | 0.096                           | 0.099                              | <b>1.571</b>                           | 4.48                   | <b>1.426</b>             | -26.08                   |
| 120 | -37.2935     | -13.4094     | 0.034                                 | <b>0.034</b>                        | 0.034                               | 0.681                          | 0.750                             | 0.00025                              | 0.094                           | 0.096                              | <b>0.776</b>                           | 3.135                  | <b>0.998</b>             | -24.87                   |
| 121 | -37.2808     | -13.4180     | 0.154                                 | <b>0.152</b>                        | 0.153                               | 1.939                          | 2.130                             | 0.00075                              | 0.158                           | 0.163                              | <b>2.100</b>                           | 5.429                  | <b>1.728</b>             | -25.25                   |
| 122 | -37.3492     | -13.6522     | 0.369                                 | <b>0.366</b>                        | 0.367                               | 2.783                          | 3.103                             | 0.00113                              | 0.184                           | 0.190                              | <b>2.970</b>                           | 6.15                   | <b>1.958</b>             | -29.21                   |
| 123 | -37.3536     | -13.6286     | 0.252                                 | <b>0.249</b>                        | 0.250                               | 2.485                          | 2.759                             | 0.00164                              | 0.155                           | 0.165                              | <b>2.644</b>                           | 6.215                  | <b>1.978</b>             | -23.52                   |
| 124 | -37.5321     | -13.7224     | 0.216                                 | <b>0.213</b>                        | 0.215                               | 2.006                          | 2.282                             | 0.00136                              | 0.274                           | 0.280                              | <b>2.283</b>                           | 5.374                  | <b>1.711</b>             | -33.50                   |
| 125 | -37.5365     | -13.5957     | 0.390                                 | <b>0.390</b>                        | 0.390                               | 3.349                          | 3.689                             | 0.00025                              | 0.086                           | 0.088                              | <b>3.439</b>                           | 6.709                  | <b>2.136</b>             | -27.05                   |
| 126 | -37.5256     | -13.4913     | 0.091                                 | <b>0.090</b>                        | 0.090                               | 2.196                          | 2.257                             | 0.00071                              | 0.255                           | 0.257                              | <b>2.454</b>                           | 5.764                  | <b>1.835</b>             | -35.26                   |
| 127 | -37.4207     | -13.3632     | 0.988                                 | <b>0.984</b>                        | 0.986                               | 6.184                          | 6.816                             | 0.00217                              | 0.290                           | 0.300                              | <b>6.483</b>                           | 9.332                  | <b>2.970</b>             | -26.17                   |
| 128 | -37.3504     | -13.1978     | 0.025                                 | <b>0.024</b>                        | 0.024                               | 0.587                          | 0.634                             | 0.00030                              | 0.100                           | 0.101                              | <b>0.688</b>                           | 2.953                  | <b>0.940</b>             | -30.46                   |
| 129 | -37.3314     | -13.2513     | 0.144                                 | <b>0.137</b>                        | 0.140                               | 1.585                          | 1.777                             | 0.00326                              | 0.295                           | 0.311                              | <b>1.882</b>                           | 4.898                  | <b>1.559</b>             | -21.74                   |
| 130 | -37.3268     | -13.2673     | 0.165                                 | <b>0.163</b>                        | 0.164                               | 1.778                          | 1.954                             | 0.00092                              | 0.111                           | 0.116                              | <b>1.892</b>                           | 5.044                  | <b>1.606</b>             | -21.69                   |
| 131 | -37.3256     | -13.2814     | 0.036                                 | <b>0.016</b>                        | 0.026                               | 0.611                          | 0.679                             | 0.01009                              | 0.510                           | 0.546                              | <b>1.122</b>                           | 3.779                  | <b>1.203</b>             | -25.74                   |
| 132 | -37.3271     | -13.2918     | 0.184                                 | <b>0.170</b>                        | 0.177                               | 1.601                          | 1.793                             | 0.00690                              | 0.308                           | 0.332                              | <b>1.912</b>                           | 4.981                  | <b>1.586</b>             | -24.94                   |
| 133 | -37.2987     | -13.2892     | 0.293                                 | <b>0.291</b>                        | 0.292                               | 2.433                          | 2.744                             | 0.00074                              | 0.133                           | 0.138                              | <b>2.569</b>                           | 5.702                  | <b>1.815</b>             | -25.65                   |
| 134 | -37.2784     | -13.2503     | 0.081                                 | <b>0.078</b>                        | 0.080                               | 1.301                          | 1.393                             | 0.00140                              | 0.212                           | 0.215                              | <b>1.514</b>                           | 4.565                  | <b>1.453</b>             | -26.03                   |
| 135 | -37.3115     | -13.3436     | 0.047                                 | <b>0.034</b>                        | 0.040                               | 1.132                          | 1.178                             | 0.00648                              | 0.409                           | 0.424                              | <b>1.543</b>                           | 4.463                  | <b>1.421</b>             | -20.26                   |
| 136 | -37.3184     | -13.3420     | 0.027                                 | <b>0.024</b>                        | 0.025                               | 0.637                          | 0.673                             | 0.00179                              | 0.249                           | 0.255                              | <b>0.887</b>                           | 3.36                   | <b>1.070</b>             | -23.42                   |
| 137 | -37.3526     | -13.4017     | 0.039                                 | <b>0.039</b>                        | 0.039                               | 0.938                          | 1.282                             | 0.00003                              | 0.010                           | 0.011                              | <b>0.953</b>                           | 3.489                  | <b>1.111</b>             | -39.99                   |
| 138 | -37.1309     | -13.2662     | 0.396                                 | <b>0.394</b>                        | 0.395                               | 2.825                          | 3.234                             | 0.00102                              | 0.096                           | 0.104                              | <b>2.925</b>                           | 6.213                  | <b>1.978</b>             | -29.17                   |
| 139 | -37.1589     | -13.2341     | 0.095                                 | <b>0.094</b>                        | 0.095                               | 1.181                          | 1.339                             | 0.00067                              | 0.109                           | 0.111                              | <b>1.291</b>                           | 4.065                  | <b>1.294</b>             | -24.72                   |
| 140 | -37.2290     | -13.1395     | 0.773                                 | <b>0.763</b>                        | 0.768                               | 4.738                          | 5.225                             | 0.00521                              | 0.388                           | 0.402                              | <b>5.133</b>                           | 8.15                   | <b>2.594</b>             | -26.57                   |

Supplementary Table 1 continued..

| #   | Lat<br>[DDD] | Lon<br>[DDD] | Total<br>volume<br>[km <sup>3</sup> ] | Net<br>volume<br>[km <sup>3</sup> ] | Cut<br>volume<br>[km <sup>3</sup> ] | Cut area<br>[km <sup>2</sup> ] | Cut area<br>3D [km <sup>2</sup> ] | Fill<br>volume<br>[km <sup>3</sup> ] | Fill area<br>[km <sup>2</sup> ] | Fill area<br>3D [km <sup>2</sup> ] | Enclosed<br>area<br>[km <sup>2</sup> ] | Peri-<br>meter<br>[km] | Mean<br>diameter<br>[km] | Back-<br>scatter<br>[dB] |
|-----|--------------|--------------|---------------------------------------|-------------------------------------|-------------------------------------|--------------------------------|-----------------------------------|--------------------------------------|---------------------------------|------------------------------------|----------------------------------------|------------------------|--------------------------|--------------------------|
| 141 | -37.2299     | -13.1594     | 0.075                                 | <b>0.073</b>                        | 0.074                               | 0.950                          | 1.067                             | 0.00088                              | 0.142                           | 0.149                              | <b>1.094</b>                           | 3.745                  | <b>1.192</b>             | -25.05                   |
| 142 | -37.2213     | -13.1554     | 0.077                                 | <b>0.077</b>                        | 0.077                               | 1.023                          | 1.154                             | 0.00040                              | 0.079                           | 0.086                              | <b>1.103</b>                           | 3.873                  | <b>1.233</b>             | -24.72                   |
| 143 | -37.2119     | -13.0797     | 0.160                                 | <b>0.159</b>                        | 0.159                               | 1.830                          | 2.030                             | 0.00038                              | 0.075                           | 0.078                              | <b>1.908</b>                           | 4.938                  | <b>1.572</b>             | -26.53                   |
| 144 | -37.2677     | -13.1475     | 0.525                                 | <b>0.523</b>                        | 0.524                               | 3.949                          | 4.395                             | 0.00082                              | 0.223                           | 0.230                              | <b>4.178</b>                           | 7.391                  | <b>2.353</b>             | -30.54                   |
| 145 | -37.2774     | -13.1613     | 0.101                                 | <b>0.099</b>                        | 0.100                               | 1.331                          | 1.468                             | 0.00104                              | 0.137                           | 0.146                              | <b>1.469</b>                           | 4.334                  | <b>1.380</b>             | -26.86                   |
| 146 | -37.3993     | -12.9380     | 0.198                                 | <b>0.196</b>                        | 0.197                               | 2.486                          | 2.649                             | 0.00120                              | 0.219                           | 0.229                              | <b>2.710</b>                           | 5.911                  | <b>1.882</b>             | -32.20                   |
| 147 | -37.4245     | -13.0178     | 0.113                                 | <b>0.112</b>                        | 0.112                               | 1.317                          | 1.479                             | 0.00059                              | 0.093                           | 0.100                              | <b>1.413</b>                           | 4.321                  | <b>1.375</b>             | -30.34                   |
| 148 | -37.3531     | -12.9946     | 0.096                                 | <b>0.095</b>                        | 0.095                               | 1.429                          | 1.535                             | 0.00008                              | 0.049                           | 0.050                              | <b>1.480</b>                           | 4.326                  | <b>1.377</b>             | -35.95                   |
| 149 | -37.3646     | -12.9738     | 0.205                                 | <b>0.203</b>                        | 0.204                               | 2.850                          | 3.160                             | 0.00062                              | 0.168                           | 0.173                              | <b>3.022</b>                           | 7.184                  | <b>2.287</b>             | -30.59                   |
| 150 | -37.6088     | -12.8333     | 0.562                                 | <b>0.558</b>                        | 0.560                               | 4.170                          | 4.585                             | 0.00202                              | 0.269                           | 0.282                              | <b>4.447</b>                           | 7.502                  | <b>2.388</b>             | -28.15                   |
| 151 | -37.6154     | -12.7942     | 0.279                                 | <b>0.278</b>                        | 0.279                               | 2.158                          | 2.485                             | 0.00059                              | 0.117                           | 0.123                              | <b>2.278</b>                           | 5.398                  | <b>1.718</b>             | -22.94                   |
| 152 | -37.6147     | -12.9351     | 0.714                                 | <b>0.713</b>                        | 0.713                               | 4.850                          | 5.373                             | 0.00068                              | 0.168                           | 0.175                              | <b>5.026</b>                           | 8.012                  | <b>2.550</b>             | -31.07                   |
| 153 | -37.6340     | -12.8063     | 0.559                                 | <b>0.554</b>                        | 0.557                               | 3.448                          | 3.886                             | 0.00215                              | 0.240                           | 0.255                              | <b>3.694</b>                           | 6.977                  | <b>2.221</b>             | -24.25                   |
| 154 | -37.7252     | -12.6207     | 0.040                                 | <b>0.040</b>                        | 0.040                               | 0.709                          | 0.786                             | 0.00042                              | 0.124                           | 0.125                              | <b>0.835</b>                           | 3.244                  | <b>1.033</b>             | -34.80                   |
| 155 | -37.7338     | -12.6163     | 0.078                                 | <b>0.076</b>                        | 0.077                               | 1.127                          | 1.253                             | 0.00117                              | 0.230                           | 0.233                              | <b>1.359</b>                           | 4.176                  | <b>1.329</b>             | -33.55                   |
| 156 | -37.7702     | -12.5252     | 0.197                                 | <b>0.191</b>                        | 0.194                               | 2.438                          | 2.666                             | 0.00301                              | 0.346                           | 0.360                              | <b>2.790</b>                           | 6.327                  | <b>2.014</b>             | -39.47                   |
| 157 | -38.4995     | -11.4926     | 0.900                                 | <b>0.890</b>                        | 0.895                               | 7.271                          | 8.170                             | 0.00518                              | 0.775                           | 0.804                              | <b>8.073</b>                           | 12.662                 | <b>4.030</b>             | -32.27                   |
| 158 | -36.9191     | -12.3159     | 0.349                                 | <b>0.349</b>                        | 0.349                               | 3.602                          | 3.926                             | 0.00013                              | 0.065                           | 0.068                              | <b>3.674</b>                           | 7.417                  | <b>2.361</b>             | -32.51                   |
| 159 | -36.9621     | -12.1426     | 0.040                                 | <b>0.040</b>                        | 0.040                               | 0.776                          | 0.832                             | 0.00020                              | 0.060                           | 0.060                              | <b>0.838</b>                           | 3.311                  | <b>1.054</b>             | -32.83                   |
| 160 | -36.9928     | -12.1698     | 0.043                                 | <b>0.043</b>                        | 0.043                               | 0.643                          | 0.758                             | 0.00022                              | 0.074                           | 0.077                              | <b>0.719</b>                           | 3.013                  | <b>0.959</b>             | -30.16                   |
| 161 | -37.1056     | -12.4541     | 0.040                                 | <b>0.038</b>                        | 0.039                               | 1.105                          | 1.131                             | 0.00075                              | 0.169                           | 0.171                              | <b>1.276</b>                           | 4.044                  | <b>1.287</b>             | -20.04                   |
| 162 | -37.1804     | -12.4870     | 0.064                                 | <b>0.063</b>                        | 0.063                               | 1.302                          | 1.366                             | 0.00018                              | 0.089                           | 0.091                              | <b>1.394</b>                           | 4.524                  | <b>1.440</b>             | -27.19                   |
| 163 | -37.1930     | -12.4367     | 0.023                                 | <b>0.023</b>                        | 0.023                               | 0.505                          | 0.557                             | 0.00007                              | 0.015                           | 0.017                              | <b>0.521</b>                           | 2.567                  | <b>0.817</b>             | -23.69                   |
| 164 | -37.2526     | -12.5004     | 0.196                                 | <b>0.195</b>                        | 0.195                               | 1.593                          | 1.825                             | 0.00050                              | 0.107                           | 0.116                              | <b>1.703</b>                           | 4.652                  | <b>1.481</b>             | -25.38                   |
| 165 | -37.2709     | -12.5081     | 0.182                                 | <b>0.182</b>                        | 0.182                               | 1.917                          | 2.208                             | 0.00021                              | 0.062                           | 0.068                              | <b>1.983</b>                           | 5.023                  | <b>1.599</b>             | -23.13                   |
| 166 | -37.2950     | -12.4308     | 0.058                                 | <b>0.050</b>                        | 0.054                               | 0.874                          | 0.985                             | 0.00398                              | 0.437                           | 0.457                              | <b>1.313</b>                           | 4.075                  | <b>1.297</b>             | -23.49                   |
| 167 | -37.2744     | -12.4169     | 0.045                                 | <b>0.042</b>                        | 0.043                               | 0.701                          | 0.809                             | 0.00154                              | 0.189                           | 0.204                              | <b>0.892</b>                           | 3.378                  | <b>1.075</b>             | -25.38                   |
| 168 | -37.3069     | -12.4116     | 0.054                                 | <b>0.054</b>                        | 0.054                               | 0.746                          | 0.827                             | 0.00009                              | 0.040                           | 0.042                              | <b>0.788</b>                           | 3.156                  | <b>1.005</b>             | -21.74                   |

Supplementary Table 1 continued..

| #   | Lat<br>[DDD] | Lon<br>[DDD] | Total<br>volume<br>[km <sup>3</sup> ] | Net<br>volume<br>[km <sup>3</sup> ] | Cut<br>volume<br>[km <sup>3</sup> ] | Cut area<br>[km <sup>2</sup> ] | Cut area<br>3D [km <sup>2</sup> ] | Fill<br>volume<br>[km <sup>3</sup> ] | Fill area<br>[km <sup>2</sup> ] | Fill area<br>3D [km <sup>2</sup> ] | Enclosed<br>area<br>[km <sup>2</sup> ] | Peri-<br>meter<br>[km] | Mean<br>diameter<br>[km] | Back-<br>scatter<br>[dB] |
|-----|--------------|--------------|---------------------------------------|-------------------------------------|-------------------------------------|--------------------------------|-----------------------------------|--------------------------------------|---------------------------------|------------------------------------|----------------------------------------|------------------------|--------------------------|--------------------------|
| 169 | -37.3160     | -12.4264     | 0.044                                 | <b>0.041</b>                        | 0.042                               | 0.773                          | 0.888                             | 0.00158                              | 0.275                           | 0.293                              | <b>1.051</b>                           | 3.641                  | <b>1.159</b>             | -26.45                   |
| 170 | -37.1268     | -12.7557     | 0.216                                 | <b>0.216</b>                        | 0.216                               | 2.784                          | 2.944                             | 0.00007                              | 0.051                           | 0.051                              | <b>2.840</b>                           | 6.32                   | <b>2.012</b>             | -32.00                   |
| 171 | -37.1226     | -12.7903     | 0.060                                 | <b>0.060</b>                        | 0.060                               | 1.282                          | 1.332                             | 0.00007                              | 0.031                           | 0.032                              | <b>1.315</b>                           | 4.166                  | <b>1.326</b>             | -37.88                   |
| 172 | -37.1878     | -12.7427     | 0.404                                 | <b>0.404</b>                        | 0.404                               | 3.001                          | 3.452                             | 0.00029                              | 0.073                           | 0.079                              | <b>3.079</b>                           | 6.323                  | <b>2.013</b>             | -18.61                   |
| 173 | -37.1949     | -12.6549     | 0.222                                 | <b>0.213</b>                        | 0.218                               | 1.976                          | 2.293                             | 0.00463                              | 0.263                           | 0.289                              | <b>2.242</b>                           | 5.379                  | <b>1.712</b>             | -25.05                   |
| 174 | -37.0353     | -12.9243     | 0.171                                 | <b>0.165</b>                        | 0.168                               | 1.793                          | 2.016                             | 0.00287                              | 0.250                           | 0.262                              | <b>2.047</b>                           | 5.103                  | <b>1.624</b>             | -37.26                   |
| 175 | -37.0473     | -12.9677     | 0.363                                 | <b>0.353</b>                        | 0.358                               | 2.969                          | 3.401                             | 0.00531                              | 0.386                           | 0.414                              | <b>3.360</b>                           | 6.553                  | <b>2.086</b>             | -33.43                   |
| 176 | -37.0282     | -12.9635     | 0.434                                 | <b>0.417</b>                        | 0.425                               | 3.814                          | 4.311                             | 0.00877                              | 0.488                           | 0.533                              | <b>4.308</b>                           | 8.043                  | <b>2.560</b>             | -27.73                   |
| 177 | -37.0371     | -12.9645     | 0.028                                 | <b>-0.018</b>                       | 0.005                               | 0.283                          | 0.306                             | 0.02331                              | 0.687                           | 0.752                              | <b>0.972</b>                           | 3.522                  | <b>1.121</b>             | -31.06                   |
| 178 | -37.0552     | -12.9958     | 0.386                                 | <b>0.384</b>                        | 0.385                               | 3.146                          | 3.571                             | 0.00054                              | 0.115                           | 0.122                              | <b>3.266</b>                           | 6.614                  | <b>2.105</b>             | -30.26                   |
| 179 | -37.0160     | -12.9679     | 0.155                                 | <b>0.154</b>                        | 0.154                               | 2.179                          | 2.433                             | 0.00060                              | 0.131                           | 0.139                              | <b>2.314</b>                           | 6.009                  | <b>1.913</b>             | -30.20                   |
| 180 | -37.0194     | -13.0261     | 0.262                                 | <b>0.258</b>                        | 0.260                               | 2.601                          | 2.904                             | 0.00233                              | 0.207                           | 0.225                              | <b>2.812</b>                           | 6.196                  | <b>1.972</b>             | -27.52                   |
| 181 | -37.0358     | -13.0270     | 0.347                                 | <b>0.345</b>                        | 0.346                               | 2.978                          | 3.278                             | 0.00087                              | 0.101                           | 0.110                              | <b>3.084</b>                           | 6.337                  | <b>2.017</b>             | -27.65                   |
| 182 | -37.0240     | -13.1216     | 0.703                                 | <b>0.689</b>                        | 0.696                               | 4.984                          | 5.668                             | 0.00686                              | 0.479                           | 0.526                              | <b>5.469</b>                           | 8.869                  | <b>2.823</b>             | -29.76                   |
| 183 | -37.0167     | -13.1045     | 0.501                                 | <b>0.488</b>                        | 0.495                               | 3.284                          | 3.712                             | 0.00656                              | 0.391                           | 0.430                              | <b>3.680</b>                           | 6.961                  | <b>2.216</b>             | -25.82                   |
| 184 | -37.0284     | -13.2428     | 0.034                                 | <b>0.031</b>                        | 0.032                               | 0.664                          | 0.722                             | 0.00139                              | 0.172                           | 0.178                              | <b>0.837</b>                           | 3.279                  | <b>1.044</b>             | -27.25                   |
| 185 | -37.0749     | -13.2442     | 0.167                                 | <b>0.166</b>                        | 0.166                               | 1.762                          | 1.970                             | 0.00059                              | 0.137                           | 0.142                              | <b>1.901</b>                           | 5.24                   | <b>1.668</b>             | -31.97                   |
| 186 | -37.0968     | -13.1641     | 0.229                                 | <b>0.228</b>                        | 0.228                               | 2.547                          | 2.776                             | 0.00041                              | 0.092                           | 0.096                              | <b>2.642</b>                           | 6.28                   | <b>1.999</b>             | -24.04                   |
| 187 | -37.0775     | -13.0646     | 0.053                                 | <b>0.050</b>                        | 0.052                               | 0.818                          | 0.930                             | 0.00120                              | 0.127                           | 0.137                              | <b>0.947</b>                           | 3.483                  | <b>1.109</b>             | -29.75                   |
| 188 | -37.0865     | -13.0347     | 0.517                                 | <b>0.512</b>                        | 0.514                               | 3.934                          | 4.534                             | 0.00294                              | 0.274                           | 0.293                              | <b>4.214</b>                           | 7.605                  | <b>2.421</b>             | -29.12                   |
| 189 | -37.0845     | -12.9993     | 0.444                                 | <b>0.438</b>                        | 0.441                               | 3.880                          | 4.438                             | 0.00295                              | 0.345                           | 0.368                              | <b>4.231</b>                           | 7.657                  | <b>2.437</b>             | -31.52                   |
| 190 | -37.1160     | -13.0402     | 0.056                                 | <b>0.055</b>                        | 0.055                               | 0.934                          | 1.020                             | 0.00077                              | 0.192                           | 0.195                              | <b>1.127</b>                           | 3.845                  | <b>1.224</b>             | -30.67                   |
| 191 | -37.1194     | -13.0261     | 0.082                                 | <b>0.078</b>                        | 0.080                               | 1.181                          | 1.301                             | 0.00233                              | 0.185                           | 0.194                              | <b>1.367</b>                           | 4.309                  | <b>1.372</b>             | -28.98                   |
| 192 | -37.2532     | -12.9490     | 0.098                                 | <b>0.096</b>                        | 0.097                               | 1.250                          | 1.610                             | 0.00090                              | 0.108                           | 0.128                              | <b>1.361</b>                           | 4.225                  | <b>1.345</b>             | -33.39                   |
| 193 | -37.2410     | -12.9351     | 0.232                                 | <b>0.232</b>                        | 0.232                               | 2.706                          | 2.945                             | 0.00019                              | 0.082                           | 0.085                              | <b>2.792</b>                           | 6.04                   | <b>1.923</b>             | -32.42                   |
| 194 | -37.2807     | -12.9736     | 0.535                                 | <b>0.534</b>                        | 0.534                               | 4.107                          | 4.656                             | 0.00083                              | 0.185                           | 0.197                              | <b>4.299</b>                           | 8.428                  | <b>2.683</b>             | -24.00                   |
| 195 | -37.3010     | -12.9516     | 0.073                                 | <b>0.072</b>                        | 0.072                               | 0.991                          | 1.145                             | 0.00051                              | 0.086                           | 0.092                              | <b>1.078</b>                           | 3.877                  | <b>1.234</b>             | -24.05                   |
| 196 | -37.3092     | -12.9894     | 0.866                                 | <b>0.865</b>                        | 0.865                               | 6.826                          | 7.255                             | 0.00051                              | 0.161                           | 0.168                              | <b>6.997</b>                           | 9.596                  | <b>3.055</b>             | -30.59                   |



Supplementary Table 1 continued..

| #   | Lat<br>[DDD] | Lon<br>[DDD] | Total<br>volume<br>[km <sup>3</sup> ] | Net<br>volume<br>[km <sup>3</sup> ] | Cut<br>volume<br>[km <sup>3</sup> ] | Cut area<br>[km <sup>2</sup> ] | Cut area<br>3D [km <sup>2</sup> ] | Fill<br>volume<br>[km <sup>3</sup> ] | Fill area<br>[km <sup>2</sup> ] | Fill area<br>3D [km <sup>2</sup> ] | Enclosed<br>area<br>[km <sup>2</sup> ] | Peri-<br>meter<br>[km] | Mean<br>diameter<br>[km] | Back-<br>scatter<br>[dB] |
|-----|--------------|--------------|---------------------------------------|-------------------------------------|-------------------------------------|--------------------------------|-----------------------------------|--------------------------------------|---------------------------------|------------------------------------|----------------------------------------|------------------------|--------------------------|--------------------------|
| 197 | -37.3121     | -13.0334     | 0.516                                 | <b>0.513</b>                        | 0.515                               | 3.562                          | 3.955                             | 0.00155                              | 0.198                           | 0.214                              | <b>3.765</b>                           | 6.953                  | <b>2.213</b>             | -22.32                   |
| 198 | -37.3408     | -13.1774     | 0.016                                 | <b>0.016</b>                        | 0.016                               | 0.558                          | 0.583                             | 0.00015                              | 0.074                           | 0.075                              | <b>0.633</b>                           | 2.828                  | <b>0.900</b>             | -30.78                   |
| 199 | -37.5791     | -13.2596     | 0.319                                 | <b>0.318</b>                        | 0.318                               | 2.730                          | 2.986                             | 0.00046                              | 0.072                           | 0.077                              | <b>2.806</b>                           | 5.953                  | <b>1.895</b>             | -23.81                   |
| 200 | -37.6400     | -13.2457     | 0.562                                 | <b>0.556</b>                        | 0.559                               | 4.169                          | 4.605                             | 0.00280                              | 0.280                           | 0.299                              | <b>4.455</b>                           | 7.624                  | <b>2.427</b>             | -20.79                   |
| 201 | -37.6597     | -13.2574     | 0.373                                 | <b>0.365</b>                        | 0.369                               | 4.217                          | 4.458                             | 0.00429                              | 0.397                           | 0.415                              | <b>4.621</b>                           | 7.739                  | <b>2.463</b>             | -19.13                   |
| 202 | -37.6321     | -13.1661     | 0.385                                 | <b>0.378</b>                        | 0.382                               | 3.926                          | 4.178                             | 0.00358                              | 0.367                           | 0.381                              | <b>4.300</b>                           | 7.741                  | <b>2.464</b>             | -25.73                   |
| 203 | -37.8707     | -13.7061     | 0.223                                 | <b>0.222</b>                        | 0.222                               | 1.819                          | 2.108                             | 0.00052                              | 0.054                           | 0.062                              | <b>1.875</b>                           | 4.885                  | <b>1.555</b>             | -35.64                   |
| 204 | -37.8744     | -13.6908     | 0.059                                 | <b>0.054</b>                        | 0.057                               | 1.170                          | 1.236                             | 0.00236                              | 0.202                           | 0.213                              | <b>1.374</b>                           | 4.289                  | <b>1.365</b>             | -32.20                   |
| 205 | -37.8930     | -13.6973     | 0.438                                 | <b>0.435</b>                        | 0.437                               | 4.059                          | 4.428                             | 0.00142                              | 0.170                           | 0.178                              | <b>4.233</b>                           | 8.172                  | <b>2.601</b>             | -29.56                   |
| 206 | -37.9087     | -13.7616     | 0.033                                 | <b>0.032</b>                        | 0.032                               | 0.614                          | 0.676                             | 0.00019                              | 0.077                           | 0.078                              | <b>0.692</b>                           | 2.975                  | <b>0.947</b>             | -38.79                   |
| 207 | -37.5616     | -13.7945     | 0.060                                 | <b>0.057</b>                        | 0.059                               | 1.016                          | 1.128                             | 0.00152                              | 0.188                           | 0.197                              | <b>1.205</b>                           | 3.909                  | <b>1.244</b>             | -33.15                   |
| 208 | -37.5536     | -13.7557     | 0.115                                 | <b>0.112</b>                        | 0.114                               | 1.608                          | 1.793                             | 0.00106                              | 0.275                           | 0.280                              | <b>1.885</b>                           | 4.922                  | <b>1.567</b>             | -33.48                   |
| 209 | -37.6672     | -13.6280     | 0.343                                 | <b>0.337</b>                        | 0.340                               | 2.790                          | 3.103                             | 0.00292                              | 0.374                           | 0.397                              | <b>3.167</b>                           | 6.431                  | <b>2.047</b>             | -28.10                   |
| 210 | -37.7413     | -13.6547     | 0.048                                 | <b>0.046</b>                        | 0.047                               | 0.908                          | 0.994                             | 0.00105                              | 0.171                           | 0.178                              | <b>1.080</b>                           | 3.701                  | <b>1.178</b>             | -32.97                   |
| 211 | -37.7405     | -13.7192     | 0.412                                 | <b>0.408</b>                        | 0.410                               | 3.790                          | 4.136                             | 0.00204                              | 0.311                           | 0.320                              | <b>4.105</b>                           | 7.45                   | <b>2.371</b>             | -31.30                   |
| 212 | -37.7476     | -13.6899     | 0.368                                 | <b>0.363</b>                        | 0.365                               | 4.277                          | 4.571                             | 0.00241                              | 0.366                           | 0.388                              | <b>4.648</b>                           | 7.906                  | <b>2.517</b>             | -34.68                   |
| 213 | -37.7921     | -13.6312     | 0.053                                 | <b>0.050</b>                        | 0.051                               | 1.841                          | 1.869                             | 0.00123                              | 0.354                           | 0.358                              | <b>2.197</b>                           | 5.282                  | <b>1.681</b>             | -40.45                   |
| 214 | -37.8049     | -13.6826     | 0.689                                 | <b>0.688</b>                        | 0.689                               | 4.806                          | 5.430                             | 0.00030                              | 0.081                           | 0.089                              | <b>4.893</b>                           | 8.732                  | <b>2.779</b>             | -29.83                   |
| 215 | -37.8365     | -13.5341     | 0.086                                 | <b>0.086</b>                        | 0.086                               | 1.630                          | 1.719                             | 0.00023                              | 0.110                           | 0.112                              | <b>1.743</b>                           | 4.844                  | <b>1.542</b>             | -31.56                   |
| 216 | -37.8531     | -13.6530     | 0.189                                 | <b>0.187</b>                        | 0.188                               | 2.479                          | 2.721                             | 0.00104                              | 0.195                           | 0.203                              | <b>2.677</b>                           | 6.352                  | <b>2.022</b>             | -26.81                   |
| 217 | -37.9747     | -14.3093     | 0.071                                 | <b>0.070</b>                        | 0.070                               | 1.716                          | 1.791                             | 0.00045                              | 0.138                           | 0.142                              | <b>1.856</b>                           | 4.846                  | <b>1.543</b>             | -27.29                   |
| 218 | -37.5695     | -12.0778     | 0.163                                 | <b>0.162</b>                        | 0.162                               | 1.679                          | 1.887                             | 0.00030                              | 0.077                           | 0.078                              | <b>1.759</b>                           | 4.744                  | <b>1.510</b>             | -29.86                   |
| 219 | -37.5613     | -12.0956     | 0.100                                 | <b>0.100</b>                        | 0.100                               | 1.323                          | 1.517                             | 0.00021                              | 0.108                           | 0.110                              | <b>1.435</b>                           | 4.277                  | <b>1.361</b>             | -38.38                   |
| 220 | -37.4970     | -12.0299     | 0.411                                 | <b>0.408</b>                        | 0.409                               | 3.270                          | 3.672                             | 0.00150                              | 0.233                           | 0.247                              | <b>3.512</b>                           | 6.691                  | <b>2.130</b>             | -27.79                   |
| 221 | -37.4801     | -12.0330     | 0.063                                 | <b>0.062</b>                        | 0.063                               | 1.014                          | 1.129                             | 0.00042                              | 0.110                           | 0.115                              | <b>1.127</b>                           | 3.804                  | <b>1.211</b>             | -26.52                   |
| 222 | -37.4919     | -12.0679     | 0.344                                 | <b>0.343</b>                        | 0.344                               | 2.627                          | 3.013                             | 0.00086                              | 0.126                           | 0.138                              | <b>2.760</b>                           | 5.989                  | <b>1.906</b>             | -22.90                   |
| 223 | -37.4912     | -12.0512     | 0.052                                 | <b>0.048</b>                        | 0.050                               | 1.155                          | 1.248                             | 0.00226                              | 0.279                           | 0.293                              | <b>1.437</b>                           | 4.28                   | <b>1.362</b>             | -25.53                   |
| 224 | -37.5097     | -12.0182     | 0.134                                 | <b>0.126</b>                        | 0.130                               | 1.370                          | 1.641                             | 0.00404                              | 0.355                           | 0.386                              | <b>1.729</b>                           | 4.712                  | <b>1.500</b>             | -33.40                   |

Supplementary Table 1 continued..

| #   | Lat<br>[DDD] | Lon<br>[DDD] | Total<br>volume<br>[km <sup>3</sup> ] | Net<br>volume<br>[km <sup>3</sup> ] | Cut<br>volume<br>[km <sup>3</sup> ] | Cut area<br>[km <sup>2</sup> ] | Cut area<br>3D [km <sup>2</sup> ] | Fill<br>volume<br>[km <sup>3</sup> ] | Fill area<br>[km <sup>2</sup> ] | Fill area<br>3D [km <sup>2</sup> ] | Enclosed<br>area<br>[km <sup>2</sup> ] | Peri-<br>meter<br>[km] | Mean<br>diameter<br>[km] | Back-<br>scatter<br>[dB] |
|-----|--------------|--------------|---------------------------------------|-------------------------------------|-------------------------------------|--------------------------------|-----------------------------------|--------------------------------------|---------------------------------|------------------------------------|----------------------------------------|------------------------|--------------------------|--------------------------|
| 225 | -37.5326     | -12.0180     | 0.855                                 | <b>0.832</b>                        | 0.843                               | 5.202                          | 5.951                             | 0.01147                              | 0.462                           | 0.504                              | <b>5.678</b>                           | 8.687                  | <b>2.765</b>             | -36.81                   |
| 226 | -37.5176     | -12.0318     | 0.130                                 | <b>0.118</b>                        | 0.124                               | 1.555                          | 1.726                             | 0.00615                              | 0.383                           | 0.408                              | <b>1.942</b>                           | 5.001                  | <b>1.592</b>             | -27.96                   |
| 227 | -37.5334     | -11.9877     | 0.058                                 | <b>0.057</b>                        | 0.057                               | 1.028                          | 1.088                             | 0.00015                              | 0.056                           | 0.058                              | <b>1.086</b>                           | 3.707                  | <b>1.180</b>             | -38.87                   |
| 228 | -37.5277     | -11.9795     | 0.025                                 | <b>0.024</b>                        | 0.025                               | 0.689                          | 0.725                             | 0.00036                              | 0.108                           | 0.110                              | <b>0.799</b>                           | 3.187                  | <b>1.014</b>             | -37.99                   |
| 229 | -37.5626     | -11.9708     | 0.029                                 | <b>0.028</b>                        | 0.029                               | 0.889                          | 0.916                             | 0.00008                              | 0.072                           | 0.073                              | <b>0.963</b>                           | 3.566                  | <b>1.135</b>             | -38.67                   |
| 230 | -37.5406     | -11.9964     | 0.037                                 | <b>0.037</b>                        | 0.037                               | 0.987                          | 1.025                             | 0.00010                              | 0.037                           | 0.038                              | <b>1.026</b>                           | 3.623                  | <b>1.153</b>             | -39.19                   |
| 231 | -37.5758     | -12.1038     | 0.049                                 | <b>0.048</b>                        | 0.049                               | 1.166                          | 1.249                             | 0.00014                              | 0.101                           | 0.102                              | <b>1.270</b>                           | 4.011                  | <b>1.277</b>             | -37.36                   |
| 234 | -37.5199     | -12.0870     | 0.063                                 | <b>0.054</b>                        | 0.059                               | 0.905                          | 1.019                             | 0.00425                              | 0.260                           | 0.283                              | <b>1.168</b>                           | 3.852                  | <b>1.226</b>             | -31.39                   |
| 235 | -37.5119     | -12.0605     | 1.024                                 | <b>1.021</b>                        | 1.022                               | 7.496                          | 8.231                             | 0.00174                              | 0.262                           | 0.283                              | <b>7.777</b>                           | 10.973                 | <b>3.493</b>             | -23.93                   |
| 236 | -37.5517     | -12.0496     | 0.094                                 | <b>0.093</b>                        | 0.093                               | 1.849                          | 1.953                             | 0.00074                              | 0.160                           | 0.164                              | <b>2.013</b>                           | 5.084                  | <b>1.618</b>             | -40.09                   |
| 237 | -37.5403     | -12.0411     | 0.097                                 | <b>0.095</b>                        | 0.096                               | 1.594                          | 1.712                             | 0.00109                              | 0.263                           | 0.269                              | <b>1.861</b>                           | 5.033                  | <b>1.602</b>             | -31.60                   |
| 238 | -37.5352     | -12.0615     | 0.164                                 | <b>0.155</b>                        | 0.159                               | 2.038                          | 2.234                             | 0.00427                              | 0.321                           | 0.346                              | <b>2.365</b>                           | 5.591                  | <b>1.780</b>             | -31.99                   |
| 239 | -37.5463     | -12.1180     | 0.407                                 | <b>0.405</b>                        | 0.406                               | 3.634                          | 4.033                             | 0.00065                              | 0.129                           | 0.135                              | <b>3.772</b>                           | 7.209                  | <b>2.295</b>             | -28.65                   |
| 240 | -37.5527     | -12.1378     | 0.053                                 | <b>0.052</b>                        | 0.052                               | 0.951                          | 1.037                             | 0.00059                              | 0.101                           | 0.105                              | <b>1.054</b>                           | 3.7                    | <b>1.178</b>             | -24.87                   |
| 241 | -37.6014     | -11.9461     | 0.058                                 | <b>0.058</b>                        | 0.058                               | 1.102                          | 1.154                             | 0.00006                              | 0.028                           | 0.029                              | <b>1.133</b>                           | 3.792                  | <b>1.207</b>             | -34.81                   |
| 242 | -37.5992     | -12.1040     | 0.025                                 | <b>0.024</b>                        | 0.024                               | 0.720                          | 0.796                             | 0.00014                              | 0.120                           | 0.121                              | <b>0.842</b>                           | 3.272                  | <b>1.042</b>             | -39.12                   |
| 243 | -37.6058     | -11.9960     | 0.050                                 | <b>0.045</b>                        | 0.048                               | 0.915                          | 0.999                             | 0.00246                              | 0.306                           | 0.314                              | <b>1.224</b>                           | 4.001                  | <b>1.274</b>             | -38.78                   |
| 244 | -37.5795     | -12.0718     | 0.031                                 | <b>0.031</b>                        | 0.031                               | 0.817                          | 0.849                             | 0.00008                              | 0.037                           | 0.037                              | <b>0.855</b>                           | 3.318                  | <b>1.056</b>             | -39.53                   |
| 245 | -37.4915     | -12.1303     | 0.035                                 | <b>0.034</b>                        | 0.035                               | 0.799                          | 0.850                             | 0.00011                              | 0.060                           | 0.061                              | <b>0.861</b>                           | 3.31                   | <b>1.054</b>             | -33.10                   |
| 246 | -37.5221     | -11.9874     | 0.050                                 | <b>0.048</b>                        | 0.049                               | 0.925                          | 0.977                             | 0.00088                              | 0.091                           | 0.099                              | <b>1.019</b>                           | 3.64                   | <b>1.159</b>             | -38.77                   |
| 247 | -37.5155     | -12.1736     | 0.156                                 | <b>0.152</b>                        | 0.154                               | 3.706                          | 3.776                             | 0.00209                              | 0.340                           | 0.349                              | <b>4.055</b>                           | 7.262                  | <b>2.312</b>             | -28.73                   |
| 248 | -37.5502     | -12.3572     | 0.059                                 | <b>0.059</b>                        | 0.059                               | 1.002                          | 1.062                             | 0.00008                              | 0.027                           | 0.029                              | <b>1.031</b>                           | 3.61                   | <b>1.149</b>             | -22.44                   |
| 249 | -37.5374     | -12.3037     | 0.276                                 | <b>0.271</b>                        | 0.274                               | 2.731                          | 2.974                             | 0.00219                              | 0.271                           | 0.283                              | <b>3.008</b>                           | 6.353                  | <b>2.022</b>             | -31.67                   |
| 250 | -37.4811     | -12.4669     | 0.193                                 | <b>0.193</b>                        | 0.193                               | 1.860                          | 2.174                             | 0.00024                              | 0.055                           | 0.060                              | <b>1.919</b>                           | 4.936                  | <b>1.571</b>             | -24.99                   |
| 251 | -37.5669     | -12.5444     | 0.170                                 | <b>0.169</b>                        | 0.170                               | 1.997                          | 2.201                             | 0.00062                              | 0.197                           | 0.201                              | <b>2.199</b>                           | 5.461                  | <b>1.738</b>             | -21.07                   |
| 252 | -37.5836     | -12.4061     | 0.265                                 | <b>0.264</b>                        | 0.264                               | 2.419                          | 2.709                             | 0.00069                              | 0.122                           | 0.131                              | <b>2.546</b>                           | 5.776                  | <b>1.839</b>             | -29.16                   |
| 253 | -37.6090     | -12.5305     | 0.181                                 | <b>0.177</b>                        | 0.179                               | 2.017                          | 2.271                             | 0.00225                              | 0.168                           | 0.182                              | <b>2.189</b>                           | 5.469                  | <b>1.741</b>             | -29.03                   |
| 254 | -37.5995     | -12.5285     | 0.037                                 | <b>0.029</b>                        | 0.033                               | 0.733                          | 0.788                             | 0.00440                              | 0.305                           | 0.320                              | <b>1.040</b>                           | 3.71                   | <b>1.181</b>             | -26.33                   |

Supplementary Table 1 continued..

| #   | Lat<br>[DDD] | Lon<br>[DDD] | Total<br>volume<br>[km <sup>3</sup> ] | Net<br>volume<br>[km <sup>3</sup> ] | Cut<br>volume<br>[km <sup>3</sup> ] | Cut area<br>[km <sup>2</sup> ] | Cut area<br>3D [km <sup>2</sup> ] | Fill<br>volume<br>[km <sup>3</sup> ] | Fill area<br>[km <sup>2</sup> ] | Fill area<br>3D [km <sup>2</sup> ] | Enclosed<br>area<br>[km <sup>2</sup> ] | Peri-<br>meter<br>[km] | Mean<br>diameter<br>[km] | Back-<br>scatter<br>[dB] |
|-----|--------------|--------------|---------------------------------------|-------------------------------------|-------------------------------------|--------------------------------|-----------------------------------|--------------------------------------|---------------------------------|------------------------------------|----------------------------------------|------------------------|--------------------------|--------------------------|
| 255 | -37.5832     | -12.5375     | 0.174                                 | <b>0.170</b>                        | 0.172                               | 2.318                          | 2.517                             | 0.00158                              | 0.202                           | 0.211                              | <b>2.525</b>                           | 6.042                  | <b>1.923</b>             | -28.53                   |
| 256 | -37.5198     | -12.4326     | 0.067                                 | <b>0.067</b>                        | 0.067                               | 1.044                          | 1.152                             | 0.00026                              | 0.065                           | 0.068                              | <b>1.111</b>                           | 3.752                  | <b>1.194</b>             | -19.44                   |
| 257 | -37.4881     | -12.3367     | 0.128                                 | <b>0.128</b>                        | 0.128                               | 1.961                          | 2.153                             | 0.00002                              | 0.022                           | 0.023                              | <b>1.986</b>                           | 5.884                  | <b>1.873</b>             | -27.18                   |
| 258 | -37.5026     | -12.3773     | 0.204                                 | <b>0.204</b>                        | 0.204                               | 2.447                          | 2.704                             | 0.00025                              | 0.070                           | 0.075                              | <b>2.523</b>                           | 6.553                  | <b>2.086</b>             | -21.71                   |
| 259 | -37.5093     | -12.3915     | 0.194                                 | <b>0.191</b>                        | 0.193                               | 1.799                          | 2.039                             | 0.00173                              | 0.143                           | 0.151                              | <b>1.946</b>                           | 5.021                  | <b>1.598</b>             | -21.84                   |
| 260 | -37.4853     | -12.3992     | 0.125                                 | <b>0.125</b>                        | 0.125                               | 2.012                          | 2.134                             | 0.00013                              | 0.062                           | 0.066                              | <b>2.079</b>                           | 5.512                  | <b>1.755</b>             | -22.89                   |
| 261 | -37.4913     | -12.4200     | 0.052                                 | <b>0.052</b>                        | 0.052                               | 0.895                          | 1.011                             | 0.00001                              | 0.013                           | 0.014                              | <b>0.910</b>                           | 3.72                   | <b>1.184</b>             | -22.54                   |
| 262 | -37.435      | -12.337      | 39.018                                | <b>38.930</b>                       | 38.974                              | 90.253                         | 98.238                            | 0.04362                              | 2.672                           | 2.859                              | <b>93.125</b>                          | 40.719                 | <b>12.961</b>            | -27.10                   |
| 263 | -37.4320     | -12.2712     | 0.088                                 | <b>0.088</b>                        | 0.088                               | 1.048                          | 1.197                             | 0.00009                              | 0.018                           | 0.019                              | <b>1.068</b>                           | 3.836                  | <b>1.221</b>             | -24.30                   |
| 264 | -37.4160     | -12.2697     | 0.233                                 | <b>0.232</b>                        | 0.232                               | 2.990                          | 3.230                             | 0.00060                              | 0.109                           | 0.117                              | <b>3.107</b>                           | 6.418                  | <b>2.043</b>             | -29.55                   |
| 265 | -37.3755     | -12.5205     | 0.481                                 | <b>0.480</b>                        | 0.481                               | 3.114                          | 3.586                             | 0.00034                              | 0.088                           | 0.095                              | <b>3.208</b>                           | 6.479                  | <b>2.062</b>             | NoData                   |
| 266 | -37.3953     | -12.5311     | 0.234                                 | <b>0.234</b>                        | 0.234                               | 2.144                          | 2.454                             | 0.00016                              | 0.071                           | 0.076                              | <b>2.219</b>                           | 5.371                  | <b>1.710</b>             | NoData                   |
| 267 | -37.4148     | -12.5412     | 0.283                                 | <b>0.276</b>                        | 0.280                               | 2.208                          | 2.592                             | 0.00356                              | 0.256                           | 0.283                              | <b>2.469</b>                           | 5.729                  | <b>1.824</b>             | NoData                   |
| 268 | -37.4376     | -12.5516     | 0.123                                 | <b>0.121</b>                        | 0.122                               | 1.193                          | 1.431                             | 0.00098                              | 0.093                           | 0.101                              | <b>1.288</b>                           | 4.048                  | <b>1.289</b>             | NoData                   |
| 269 | -37.4367     | -12.5391     | 0.046                                 | <b>0.045</b>                        | 0.046                               | 0.729                          | 0.816                             | 0.00048                              | 0.064                           | 0.068                              | <b>0.795</b>                           | 3.219                  | <b>1.025</b>             | NoData                   |
| 270 | -37.4499     | -12.5415     | 0.074                                 | <b>0.069</b>                        | 0.072                               | 0.720                          | 0.915                             | 0.00235                              | 0.149                           | 0.184                              | <b>0.870</b>                           | 3.349                  | <b>1.066</b>             | -37.54                   |
| 271 | -37.3476     | -12.5141     | 0.021                                 | <b>0.020</b>                        | 0.021                               | 0.542                          | 0.595                             | 0.00022                              | 0.098                           | 0.102                              | <b>0.642</b>                           | 2.862                  | <b>0.911</b>             | NoData                   |
| 272 | -37.5134     | -12.5220     | 0.177                                 | <b>0.176</b>                        | 0.176                               | 1.885                          | 2.136                             | 0.00044                              | 0.073                           | 0.077                              | <b>1.962</b>                           | 5.438                  | <b>1.731</b>             | -23.47                   |
| 273 | -37.5165     | -12.4815     | 0.188                                 | <b>0.188</b>                        | 0.188                               | 1.945                          | 2.140                             | 0.00007                              | 0.048                           | 0.049                              | <b>1.997</b>                           | 5.303                  | <b>1.688</b>             | -23.19                   |
| 274 | -37.5199     | -12.5465     | 0.053                                 | <b>0.052</b>                        | 0.052                               | 1.022                          | 1.102                             | 0.00015                              | 0.056                           | 0.058                              | <b>1.081</b>                           | 3.853                  | <b>1.226</b>             | -26.00                   |
| 275 | -37.4912     | -12.5358     | 0.063                                 | <b>0.063</b>                        | 0.063                               | 1.015                          | 1.127                             | 0.00004                              | 0.039                           | 0.040                              | <b>1.056</b>                           | 3.792                  | <b>1.207</b>             | -21.19                   |
| 276 | -37.4903     | -12.4906     | 0.022                                 | <b>0.022</b>                        | 0.022                               | 0.480                          | 0.532                             | 0.00006                              | 0.025                           | 0.027                              | <b>0.506</b>                           | 2.555                  | <b>0.813</b>             | -24.98                   |
| 277 | -37.4741     | -12.6057     | 0.152                                 | <b>0.152</b>                        | 0.152                               | 1.740                          | 1.982                             | 0.00019                              | 0.075                           | 0.079                              | <b>1.818</b>                           | 5.169                  | <b>1.645</b>             | -19.25                   |
| 278 | -37.4910     | -12.5538     | 0.040                                 | <b>0.040</b>                        | 0.040                               | 0.939                          | 0.998                             | 0.00017                              | 0.077                           | 0.080                              | <b>1.018</b>                           | 3.657                  | <b>1.164</b>             | -25.26                   |
| 279 | -37.565      | -12.743      | 69.756                                | <b>69.704</b>                       | 69.730                              | 138.840                        | 171.590                           | 0.02620                              | 2.051                           | 2.385                              | <b>145.770</b>                         | 55.303                 | <b>17.603</b>            | -24.62                   |
| 280 | -37.5044     | -12.6976     | 0.111                                 | <b>0.110</b>                        | 0.111                               | 1.263                          | 1.426                             | 0.00025                              | 0.044                           | 0.049                              | <b>1.309</b>                           | 4.373                  | <b>1.392</b>             | -24.14                   |
| 281 | -37.4681     | -12.7510     | 0.104                                 | <b>0.103</b>                        | 0.104                               | 1.351                          | 1.518                             | 0.00028                              | 0.043                           | 0.047                              | <b>1.396</b>                           | 4.556                  | <b>1.450</b>             | -24.67                   |
| 282 | -37.4906     | -12.8432     | 0.241                                 | <b>0.240</b>                        | 0.241                               | 2.759                          | 3.007                             | 0.00050                              | 0.159                           | 0.162                              | <b>2.923</b>                           | 6.245                  | <b>1.988</b>             | -36.60                   |

Supplementary Table 1 continued..

| #   | Lat<br>[DDD] | Lon<br>[DDD] | Total<br>volume<br>[km <sup>3</sup> ] | Net<br>volume<br>[km <sup>3</sup> ] | Cut<br>volume<br>[km <sup>3</sup> ] | Cut area<br>[km <sup>2</sup> ] | Cut area<br>3D [km <sup>2</sup> ] | Fill<br>volume<br>[km <sup>3</sup> ] | Fill area<br>[km <sup>2</sup> ] | Fill area<br>3D [km <sup>2</sup> ] | Enclosed<br>area<br>[km <sup>2</sup> ] | Peri-<br>meter<br>[km] | Mean<br>diameter<br>[km] | Back-<br>scatter<br>[dB] |
|-----|--------------|--------------|---------------------------------------|-------------------------------------|-------------------------------------|--------------------------------|-----------------------------------|--------------------------------------|---------------------------------|------------------------------------|----------------------------------------|------------------------|--------------------------|--------------------------|
| 283 | -37.4746     | -12.8192     | 0.038                                 | <b>0.038</b>                        | 0.038                               | 0.607                          | 0.686                             | 0.00004                              | 0.022                           | 0.022                              | <b>0.630</b>                           | 2.847                  | <b>0.906</b>             | -26.44                   |
| 284 | -37.5440     | -12.8151     | 0.031                                 | <b>0.031</b>                        | 0.031                               | 0.530                          | 0.606                             | 0.00013                              | 0.037                           | 0.041                              | <b>0.567</b>                           | 2.702                  | <b>0.860</b>             | -23.70                   |
| 285 | -37.6121     | -12.6845     | 0.205                                 | <b>0.200</b>                        | 0.203                               | 2.041                          | 2.358                             | 0.00271                              | 0.256                           | 0.282                              | <b>2.301</b>                           | 6.123                  | <b>1.949</b>             | -25.96                   |
| 286 | -37.6204     | -12.6789     | 0.115                                 | <b>0.111</b>                        | 0.113                               | 1.711                          | 1.969                             | 0.00211                              | 0.225                           | 0.250                              | <b>1.939</b>                           | 5.783                  | <b>1.841</b>             | -26.09                   |
| 287 | -37.6470     | -12.6977     | 1.059                                 | <b>1.058</b>                        | 1.058                               | 6.084                          | 6.892                             | 0.00036                              | 0.072                           | 0.082                              | <b>6.167</b>                           | 9.368                  | <b>2.982</b>             | -27.02                   |
| 288 | -37.6464     | -12.6275     | 0.028                                 | <b>0.027</b>                        | 0.027                               | 0.651                          | 0.703                             | 0.00063                              | 0.074                           | 0.083                              | <b>0.726</b>                           | 3.05                   | <b>0.971</b>             | -34.59                   |
| 289 | -37.5936     | -12.8795     | 0.049                                 | <b>0.049</b>                        | 0.049                               | 1.285                          | 1.321                             | 0.00004                              | 0.040                           | 0.040                              | <b>1.327</b>                           | 4.117                  | <b>1.310</b>             | -41.91                   |
| 290 | -37.6334     | -12.8623     | 0.026                                 | <b>0.026</b>                        | 0.026                               | 0.601                          | 0.637                             | 0.00005                              | 0.019                           | 0.020                              | <b>0.622</b>                           | 2.81                   | <b>0.894</b>             | -35.48                   |
| 291 | -37.5915     | -12.9391     | 0.209                                 | <b>0.206</b>                        | 0.208                               | 4.120                          | 4.269                             | 0.00130                              | 0.222                           | 0.233                              | <b>4.348</b>                           | 7.681                  | <b>2.445</b>             | -39.82                   |
| 292 | -37.6587     | -12.9734     | 0.028                                 | <b>0.028</b>                        | 0.028                               | 0.845                          | 0.870                             | 0.00003                              | 0.027                           | 0.027                              | <b>0.873</b>                           | 3.37                   | <b>1.073</b>             | -38.54                   |
| 293 | -37.6743     | -12.9742     | 0.019                                 | <b>0.019</b>                        | 0.019                               | 0.743                          | 0.763                             | 0.00018                              | 0.096                           | 0.097                              | <b>0.840</b>                           | 3.289                  | <b>1.047</b>             | -36.71                   |
| 294 | -37.7207     | -12.9238     | 0.109                                 | <b>0.109</b>                        | 0.109                               | 1.963                          | 2.033                             | 0.00007                              | 0.044                           | 0.045                              | <b>2.010</b>                           | 5.478                  | <b>1.744</b>             | -38.39                   |
| 295 | -37.7368     | -12.9497     | 0.032                                 | <b>0.031</b>                        | 0.032                               | 0.695                          | 0.739                             | 0.00004                              | 0.025                           | 0.025                              | <b>0.721</b>                           | 3.064                  | <b>0.975</b>             | -40.92                   |
| 296 | -37.7260     | -12.9730     | 0.158                                 | <b>0.157</b>                        | 0.157                               | 2.219                          | 2.385                             | 0.00018                              | 0.071                           | 0.074                              | <b>2.294</b>                           | 5.808                  | <b>1.849</b>             | -33.57                   |
| 297 | -37.7198     | -12.8623     | 0.022                                 | <b>0.022</b>                        | 0.022                               | 0.718                          | 0.750                             | 0.00022                              | 0.044                           | 0.046                              | <b>0.764</b>                           | 3.342                  | <b>1.064</b>             | -38.68                   |
| 298 | -37.7492     | -12.8463     | 0.073                                 | <b>0.072</b>                        | 0.073                               | 1.443                          | 1.521                             | 0.00085                              | 0.105                           | 0.111                              | <b>1.550</b>                           | 4.46                   | <b>1.420</b>             | -32.23                   |
| 299 | -37.6566     | -12.5547     | 0.047                                 | <b>0.047</b>                        | 0.047                               | 1.276                          | 1.359                             | 0.00039                              | 0.141                           | 0.143                              | <b>1.420</b>                           | 5.511                  | <b>1.754</b>             | -34.82                   |
| 300 | -37.4261     | -12.7206     | 0.095                                 | <b>0.094</b>                        | 0.095                               | 1.093                          | 1.227                             | 0.00074                              | 0.099                           | 0.108                              | <b>1.194</b>                           | 3.955                  | <b>1.259</b>             | -27.48                   |
| 301 | -37.3225     | -13.0545     | 0.083                                 | <b>0.079</b>                        | 0.081                               | 1.318                          | 1.461                             | 0.00213                              | 0.300                           | 0.314                              | <b>1.620</b>                           | 4.895                  | <b>1.558</b>             | -25.10                   |
| 302 | -37.3548     | -13.0737     | 0.025                                 | <b>0.025</b>                        | 0.025                               | 0.578                          | 0.623                             | 0.00012                              | 0.043                           | 0.044                              | <b>0.622</b>                           | 2.848                  | <b>0.907</b>             | -33.80                   |
| 303 | -37.3184     | -13.1375     | 0.072                                 | <b>0.072</b>                        | 0.072                               | 1.447                          | 1.543                             | 0.00002                              | 0.028                           | 0.029                              | <b>1.477</b>                           | 4.993                  | <b>1.589</b>             | -27.54                   |
| 304 | -37.3297     | -13.1062     | 0.075                                 | <b>0.074</b>                        | 0.074                               | 1.446                          | 1.567                             | 0.00076                              | 0.149                           | 0.154                              | <b>1.597</b>                           | 5.613                  | <b>1.787</b>             | -25.61                   |
| 305 | -37.5201     | -13.6046     | 0.344                                 | <b>0.333</b>                        | 0.339                               | 3.460                          | 3.726                             | 0.00577                              | 0.343                           | 0.373                              | <b>3.808</b>                           | 7.008                  | <b>2.231</b>             | -27.06                   |
| 306 | -37.5492     | -13.7755     | 0.038                                 | <b>0.038</b>                        | 0.038                               | 0.920                          | 0.964                             | 0.00008                              | 0.031                           | 0.031                              | <b>0.952</b>                           | 3.5                    | <b>1.114</b>             | -33.83                   |
| 307 | -37.6461     | -13.9358     | 1.712                                 | <b>1.697</b>                        | 1.704                               | 12.101                         | 12.833                            | 0.00747                              | 0.673                           | 0.719                              | <b>12.787</b>                          | 12.933                 | <b>4.117</b>             | -32.48                   |
| 308 | -37.7098     | -13.9631     | 0.151                                 | <b>0.150</b>                        | 0.151                               | 1.814                          | 1.947                             | 0.00058                              | 0.105                           | 0.109                              | <b>1.920</b>                           | 4.945                  | <b>1.574</b>             | -24.39                   |
| 309 | -37.8536     | -14.0271     | 1.197                                 | <b>1.188</b>                        | 1.192                               | 7.216                          | 7.933                             | 0.00430                              | 0.341                           | 0.375                              | <b>7.565</b>                           | 10.539                 | <b>3.355</b>             | -26.47                   |
| 310 | -37.9823     | -14.0310     | 0.056                                 | <b>0.056</b>                        | 0.056                               | 1.311                          | 1.353                             | 0.00005                              | 0.023                           | 0.024                              | <b>1.335</b>                           | 4.119                  | <b>1.311</b>             | -35.65                   |

Supplementary Table 1 continued..

| #   | Lat<br>[DDD] | Lon<br>[DDD] | Total<br>volume<br>[km <sup>3</sup> ] | Net<br>volume<br>[km <sup>3</sup> ] | Cut<br>volume<br>[km <sup>3</sup> ] | Cut area<br>[km <sup>2</sup> ] | Cut area<br>3D [km <sup>2</sup> ] | Fill<br>volume<br>[km <sup>3</sup> ] | Fill area<br>[km <sup>2</sup> ] | Fill area<br>3D [km <sup>2</sup> ] | Enclosed<br>area<br>[km <sup>2</sup> ] | Peri-<br>meter<br>[km] | Mean<br>diameter<br>[km] | Back-<br>scatter<br>[dB] |
|-----|--------------|--------------|---------------------------------------|-------------------------------------|-------------------------------------|--------------------------------|-----------------------------------|--------------------------------------|---------------------------------|------------------------------------|----------------------------------------|------------------------|--------------------------|--------------------------|
| 311 | -37.9686     | -14.0426     | 0.067                                 | <b>0.065</b>                        | 0.066                               | 1.281                          | 1.352                             | 0.00085                              | 0.083                           | 0.092                              | <b>1.366</b>                           | 4.526                  | <b>1.441</b>             | -34.08                   |
| 312 | -38.0372     | -14.0849     | 0.135                                 | <b>0.135</b>                        | 0.135                               | 2.901                          | 4.178                             | 0.00008                              | 0.038                           | 0.069                              | <b>3.241</b>                           | 6.556                  | <b>2.087</b>             | -31.95                   |
| 313 | -38.0049     | -13.9204     | 0.051                                 | <b>0.050</b>                        | 0.050                               | 1.411                          | 1.440                             | 0.00034                              | 0.095                           | 0.096                              | <b>1.507</b>                           | 4.414                  | <b>1.405</b>             | -31.38                   |
| 314 | -38.3037     | -14.6635     | 0.049                                 | <b>0.049</b>                        | 0.049                               | 0.944                          | 1.020                             | 0.00019                              | 0.074                           | 0.076                              | <b>1.019</b>                           | 3.634                  | <b>1.157</b>             | -24.61                   |
| 315 | -38.3193     | -14.6414     | 0.094                                 | <b>0.093</b>                        | 0.093                               | 2.041                          | 2.101                             | 0.00030                              | 0.095                           | 0.097                              | <b>2.138</b>                           | 5.35                   | <b>1.703</b>             | -24.64                   |
| 316 | -38.2827     | -14.6381     | 0.322                                 | <b>0.321</b>                        | 0.321                               | 2.737                          | 3.087                             | 0.00053                              | 0.117                           | 0.121                              | <b>2.857</b>                           | 6.239                  | <b>1.986</b>             | -22.42                   |
| 317 | -38.2678     | -14.6503     | 0.152                                 | <b>0.148</b>                        | 0.150                               | 2.776                          | 2.904                             | 0.00198                              | 0.231                           | 0.241                              | <b>3.009</b>                           | 6.37                   | <b>2.028</b>             | -23.70                   |
| 318 | -38.1139     | -14.5970     | 0.182                                 | <b>0.179</b>                        | 0.181                               | 2.522                          | 2.672                             | 0.00118                              | 0.185                           | 0.190                              | <b>2.709</b>                           | 6.056                  | <b>1.928</b>             | -24.48                   |
| 319 | -38.0894     | -14.5257     | 0.401                                 | <b>0.397</b>                        | 0.399                               | 3.650                          | 3.955                             | 0.00223                              | 0.220                           | 0.233                              | <b>3.874</b>                           | 7.296                  | <b>2.322</b>             | -27.78                   |
| 320 | -38.2061     | -14.7966     | 0.246                                 | <b>0.240</b>                        | 0.243                               | 4.896                          | 5.090                             | 0.00276                              | 0.475                           | 0.491                              | <b>5.376</b>                           | 8.607                  | <b>2.740</b>             | -27.75                   |
| 321 | -38.5057     | -14.3878     | 1.998                                 | <b>1.989</b>                        | 1.994                               | 11.393                         | 12.645                            | 0.00407                              | 0.290                           | 0.350                              | <b>11.695</b>                          | 13.735                 | <b>4.372</b>             | -34.54                   |
| 322 | -38.4877     | -14.4357     | 0.597                                 | <b>0.594</b>                        | 0.595                               | 5.243                          | 5.867                             | 0.00163                              | 0.256                           | 0.276                              | <b>5.504</b>                           | 9.306                  | <b>2.962</b>             | -32.13                   |
| 323 | -38.6129     | -14.2380     | 0.069                                 | <b>0.069</b>                        | 0.069                               | 1.029                          | 1.161                             | 0.00043                              | 0.128                           | 0.132                              | <b>1.159</b>                           | 3.989                  | <b>1.270</b>             | -36.52                   |
| 324 | -38.8037     | -13.3989     | 0.410                                 | <b>0.410</b>                        | 0.410                               | 3.414                          | 3.821                             | 0.00029                              | 0.102                           | 0.105                              | <b>3.522</b>                           | 7.014                  | <b>2.233</b>             | -36.23                   |
| 325 | -38.8994     | -13.4129     | 0.097                                 | <b>0.096</b>                        | 0.097                               | 1.432                          | 1.545                             | 0.00047                              | 0.061                           | 0.068                              | <b>1.496</b>                           | 4.515                  | <b>1.437</b>             | -28.43                   |
| 326 | -38.8511     | -13.3748     | 0.053                                 | <b>0.053</b>                        | 0.053                               | 0.807                          | 0.898                             | 0.00009                              | 0.041                           | 0.042                              | <b>0.849</b>                           | 3.291                  | <b>1.048</b>             | -34.65                   |
| 327 | -38.7436     | -13.2283     | 0.384                                 | <b>0.383</b>                        | 0.383                               | 3.306                          | 3.620                             | 0.00070                              | 0.183                           | 0.186                              | <b>3.495</b>                           | 6.827                  | <b>2.173</b>             | -34.17                   |
| 328 | -38.7376     | -13.1883     | 0.199                                 | <b>0.198</b>                        | 0.199                               | 2.731                          | 2.930                             | 0.00068                              | 0.108                           | 0.114                              | <b>2.843</b>                           | 6.353                  | <b>2.022</b>             | -32.93                   |
| 329 | -38.5875     | -13.1875     | 0.031                                 | <b>0.029</b>                        | 0.030                               | 0.562                          | 0.664                             | 0.00067                              | 0.078                           | 0.089                              | <b>0.641</b>                           | 2.858                  | <b>0.910</b>             | -40.20                   |
| 330 | -38.4491     | -11.3081     | 0.999                                 | <b>0.994</b>                        | 0.996                               | 7.601                          | 8.429                             | 0.00234                              | 0.292                           | 0.315                              | <b>7.922</b>                           | 11.15                  | <b>3.549</b>             | -30.64                   |
| 331 | -37.5264     | -9.7283      | 15.539                                | <b>15.504</b>                       | 15.521                              | 66.044                         | 71.695                            | 0.01727                              | 1.025                           | 1.095                              | <b>67.482</b>                          | 40.086                 | <b>12.760</b>            | -25.64                   |
| 332 | -37.1302     | -10.0937     | 2.212                                 | <b>2.207</b>                        | 2.210                               | 14.593                         | 15.663                            | 0.00258                              | 0.332                           | 0.365                              | <b>15.005</b>                          | 16.006                 | <b>5.095</b>             | -25.25                   |
| 333 | -35.5822     | -11.4615     | 0.337                                 | <b>0.337</b>                        | 0.337                               | 2.345                          | 2.729                             | 0.00005                              | 0.021                           | 0.023                              | <b>2.372</b>                           | 5.593                  | <b>1.780</b>             | -34.07                   |
| 334 | -35.5472     | -11.5123     | 2.397                                 | <b>2.394</b>                        | 2.396                               | 17.438                         | 18.275                            | 0.00137                              | 0.239                           | 0.264                              | <b>17.727</b>                          | 16.437                 | <b>5.232</b>             | -29.79                   |
| 335 | -35.5861     | -11.5045     | 1.382                                 | <b>1.367</b>                        | 1.374                               | 13.812                         | 14.569                            | 0.00786                              | 0.408                           | 0.521                              | <b>14.261</b>                          | 16.348                 | <b>5.204</b>             | -36.30                   |
| 336 | -36.9807     | -12.2671     | 0.052                                 | <b>0.052</b>                        | 0.052                               | 0.800                          | 0.906                             | 0.00000                              | 0.004                           | 0.004                              | <b>0.805</b>                           | 3.434                  | <b>1.093</b>             | -23.37                   |
| 337 | -36.9976     | -12.2715     | 0.099                                 | <b>0.099</b>                        | 0.099                               | 1.342                          | 1.520                             | 0.00006                              | 0.030                           | 0.032                              | <b>1.376</b>                           | 4.507                  | <b>1.435</b>             | -23.42                   |
| 338 | -37.0088     | -12.2523     | 0.029                                 | <b>0.029</b>                        | 0.029                               | 0.666                          | 0.753                             | 0.00028                              | 0.082                           | 0.087                              | <b>0.750</b>                           | 3.282                  | <b>1.045</b>             | -25.75                   |

Supplementary Table 1 continued..

| #   | Lat<br>[DDD] | Lon<br>[DDD] | Total<br>volume<br>[km <sup>3</sup> ] | Net<br>volume<br>[km <sup>3</sup> ] | Cut<br>volume<br>[km <sup>3</sup> ] | Cut area<br>[km <sup>2</sup> ] | Cut area<br>3D [km <sup>2</sup> ] | Fill<br>volume<br>[km <sup>3</sup> ] | Fill area<br>[km <sup>2</sup> ] | Fill area<br>3D [km <sup>2</sup> ] | Enclosed<br>area<br>[km <sup>2</sup> ] | Peri-<br>meter<br>[km] | Mean<br>diameter<br>[km] | Back-<br>scatter<br>[dB] |
|-----|--------------|--------------|---------------------------------------|-------------------------------------|-------------------------------------|--------------------------------|-----------------------------------|--------------------------------------|---------------------------------|------------------------------------|----------------------------------------|------------------------|--------------------------|--------------------------|
| 339 | -37.0254     | -12.3239     | 0.305                                 | <b>0.305</b>                        | 0.305                               | 3.087                          | 3.498                             | 0.00008                              | 0.070                           | 0.074                              | <b>3.164</b>                           | 6.469                  | <b>2.059</b>             | -23.43                   |
| 340 | -37.0381     | -12.3552     | 0.125                                 | <b>0.124</b>                        | 0.125                               | 1.498                          | 1.716                             | 0.00060                              | 0.061                           | 0.067                              | <b>1.563</b>                           | 4.562                  | <b>1.452</b>             | -22.88                   |
| 341 | -36.9844     | -12.3380     | 0.093                                 | <b>0.092</b>                        | 0.093                               | 1.982                          | 2.103                             | 0.00022                              | 0.072                           | 0.076                              | <b>2.058</b>                           | 5.632                  | <b>1.793</b>             | -26.76                   |
| 342 | -37.0105     | -12.2764     | 0.025                                 | <b>0.024</b>                        | 0.025                               | 0.641                          | 0.706                             | 0.00034                              | 0.086                           | 0.093                              | <b>0.728</b>                           | 3.211                  | <b>1.022</b>             | -26.28                   |
| 343 | -37.0863     | -12.1423     | 0.149                                 | <b>0.149</b>                        | 0.149                               | 1.963                          | 2.216                             | 0.00018                              | 0.061                           | 0.066                              | <b>2.029</b>                           | 5.745                  | <b>1.829</b>             | -23.27                   |
| 344 | -37.1314     | -12.1464     | 0.503                                 | <b>0.502</b>                        | 0.503                               | 3.746                          | 4.235                             | 0.00014                              | 0.054                           | 0.057                              | <b>3.809</b>                           | 7.488                  | <b>2.384</b>             | -22.80                   |
| 345 | -37.1069     | -12.1265     | 0.586                                 | <b>0.586</b>                        | 0.586                               | 5.308                          | 5.741                             | 0.00043                              | 0.129                           | 0.137                              | <b>5.450</b>                           | 8.704                  | <b>2.771</b>             | -23.13                   |
| 346 | -37.1139     | -12.1637     | 0.126                                 | <b>0.124</b>                        | 0.125                               | 2.027                          | 2.258                             | 0.00095                              | 0.245                           | 0.261                              | <b>2.277</b>                           | 5.664                  | <b>1.803</b>             | -21.82                   |
| 347 | -37.1201     | -12.0521     | 0.129                                 | <b>0.128</b>                        | 0.129                               | 2.054                          | 2.217                             | 0.00051                              | 0.118                           | 0.124                              | <b>2.176</b>                           | 5.932                  | <b>1.888</b>             | -34.95                   |
| 348 | -37.1649     | -12.0673     | 0.079                                 | <b>0.079</b>                        | 0.079                               | 1.393                          | 1.469                             | 0.00011                              | 0.039                           | 0.041                              | <b>1.435</b>                           | 4.342                  | <b>1.382</b>             | -35.24                   |
| 349 | -37.1581     | -12.0406     | 0.020                                 | <b>0.020</b>                        | 0.020                               | 0.661                          | 0.685                             | 0.00006                              | 0.040                           | 0.041                              | <b>0.703</b>                           | 3.001                  | <b>0.955</b>             | -34.52                   |
| 350 | -37.1720     | -12.0261     | 0.036                                 | <b>0.035</b>                        | 0.035                               | 0.698                          | 0.769                             | 0.00037                              | 0.076                           | 0.078                              | <b>0.775</b>                           | 3.129                  | <b>0.996</b>             | -33.94                   |
| 351 | -37.1647     | -11.9520     | 0.010                                 | <b>0.010</b>                        | 0.010                               | 0.531                          | 0.539                             | 0.00007                              | 0.042                           | 0.042                              | <b>0.574</b>                           | 2.692                  | <b>0.857</b>             | -36.88                   |
| 352 | -37.1303     | -11.9531     | 0.049                                 | <b>0.049</b>                        | 0.049                               | 1.148                          | 1.185                             | 0.00005                              | 0.026                           | 0.027                              | <b>1.177</b>                           | 3.94                   | <b>1.254</b>             | -36.01                   |
| 353 | -37.0707     | -12.0770     | 0.058                                 | <b>0.057</b>                        | 0.058                               | 0.963                          | 1.066                             | 0.00051                              | 0.093                           | 0.099                              | <b>1.059</b>                           | 3.702                  | <b>1.178</b>             | -25.42                   |
| 354 | -37.0830     | -12.0736     | 0.471                                 | <b>0.467</b>                        | 0.469                               | 3.901                          | 4.248                             | 0.00213                              | 0.233                           | 0.241                              | <b>4.144</b>                           | 7.704                  | <b>2.452</b>             | -26.91                   |
| 355 | -37.2397     | -12.0044     | 0.255                                 | <b>0.254</b>                        | 0.255                               | 4.084                          | 4.171                             | 0.00043                              | 0.119                           | 0.123                              | <b>4.213</b>                           | 7.633                  | <b>2.430</b>             | -39.25                   |
| 356 | -37.2296     | -12.1102     | 0.164                                 | <b>0.164</b>                        | 0.164                               | 2.342                          | 2.453                             | 0.00007                              | 0.048                           | 0.050                              | <b>2.396</b>                           | 5.529                  | <b>1.760</b>             | -27.40                   |
| 357 | -37.2575     | -12.1276     | 0.079                                 | <b>0.078</b>                        | 0.079                               | 2.064                          | 2.133                             | 0.00022                              | 0.072                           | 0.075                              | <b>2.141</b>                           | 5.602                  | <b>1.783</b>             | -32.03                   |
| 358 | -37.2383     | -12.1342     | 0.171                                 | <b>0.170</b>                        | 0.171                               | 3.288                          | 3.440                             | 0.00041                              | 0.083                           | 0.092                              | <b>3.379</b>                           | 7.132                  | <b>2.270</b>             | -30.28                   |
| 359 | -37.2340     | -12.1505     | 0.027                                 | <b>0.027</b>                        | 0.027                               | 0.876                          | 0.906                             | 0.00035                              | 0.080                           | 0.082                              | <b>0.959</b>                           | 3.496                  | <b>1.113</b>             | -30.69                   |
| 360 | -37.2564     | -12.2461     | 0.161                                 | <b>0.159</b>                        | 0.160                               | 2.631                          | 2.750                             | 0.00095                              | 0.250                           | 0.256                              | <b>2.888</b>                           | 6.274                  | <b>1.997</b>             | -26.58                   |
| 361 | -37.2908     | -12.2975     | 0.329                                 | <b>0.328</b>                        | 0.329                               | 3.066                          | 3.411                             | 0.00028                              | 0.091                           | 0.093                              | <b>3.163</b>                           | 7.039                  | <b>2.241</b>             | -26.96                   |
| 362 | -37.2757     | -12.3449     | 0.536                                 | <b>0.536</b>                        | 0.536                               | 4.223                          | 4.635                             | 0.00016                              | 0.057                           | 0.059                              | <b>4.289</b>                           | 7.692                  | <b>2.448</b>             | -24.73                   |
| 363 | -37.3425     | -12.4177     | 0.083                                 | <b>0.081</b>                        | 0.082                               | 0.984                          | 1.100                             | 0.00084                              | 0.143                           | 0.148                              | <b>1.129</b>                           | 3.815                  | <b>1.214</b>             | -22.45                   |
| 364 | -37.3215     | -12.4364     | 0.237                                 | <b>0.234</b>                        | 0.236                               | 1.907                          | 2.184                             | 0.00151                              | 0.125                           | 0.135                              | <b>2.036</b>                           | 5.103                  | <b>1.624</b>             | -24.48                   |
| 365 | -37.3872     | -12.3851     | 0.268                                 | <b>0.268</b>                        | 0.268                               | 2.887                          | 3.125                             | 0.00012                              | 0.040                           | 0.042                              | <b>2.933</b>                           | 6.899                  | <b>2.196</b>             | -28.39                   |
| 366 | -37.3419     | -12.3471     | 0.044                                 | <b>0.044</b>                        | 0.044                               | 0.665                          | 0.745                             | 0.00017                              | 0.052                           | 0.054                              | <b>0.719</b>                           | 3.026                  | <b>0.963</b>             | -25.34                   |

Supplementary Table 1 continued..

| #   | Lat<br>[DDD] | Lon<br>[DDD] | Total<br>volume<br>[km <sup>3</sup> ] | Net<br>volume<br>[km <sup>3</sup> ] | Cut<br>volume<br>[km <sup>3</sup> ] | Cut area<br>[km <sup>2</sup> ] | Cut area<br>3D [km <sup>2</sup> ] | Fill<br>volume<br>[km <sup>3</sup> ] | Fill area<br>[km <sup>2</sup> ] | Fill area<br>3D [km <sup>2</sup> ] | Enclosed<br>area<br>[km <sup>2</sup> ] | Peri-<br>meter<br>[km] | Mean<br>diameter<br>[km] | Back-<br>scatter<br>[dB] |
|-----|--------------|--------------|---------------------------------------|-------------------------------------|-------------------------------------|--------------------------------|-----------------------------------|--------------------------------------|---------------------------------|------------------------------------|----------------------------------------|------------------------|--------------------------|--------------------------|
| 367 | -37.3369     | -12.3695     | 0.044                                 | <b>0.042</b>                        | 0.043                               | 0.725                          | 0.797                             | 0.00063                              | 0.103                           | 0.110                              | <b>0.830</b>                           | 3.236                  | <b>1.030</b>             | -19.61                   |
| 368 | -37.3125     | -12.3538     | 0.069                                 | <b>0.069</b>                        | 0.069                               | 0.810                          | 0.952                             | 0.00004                              | 0.010                           | 0.012                              | <b>0.822</b>                           | 3.302                  | <b>1.051</b>             | -27.56                   |
| 369 | -37.3219     | -12.3574     | 0.169                                 | <b>0.169</b>                        | 0.169                               | 1.485                          | 1.706                             | 0.00010                              | 0.026                           | 0.028                              | <b>1.514</b>                           | 4.433                  | <b>1.411</b>             | -24.20                   |
| 370 | -37.3270     | -12.3215     | 0.087                                 | <b>0.085</b>                        | 0.086                               | 1.101                          | 1.229                             | 0.00060                              | 0.104                           | 0.111                              | <b>1.207</b>                           | 4.225                  | <b>1.345</b>             | -22.38                   |
| 371 | -37.3159     | -12.3085     | 0.145                                 | <b>0.144</b>                        | 0.144                               | 1.646                          | 1.848                             | 0.00050                              | 0.103                           | 0.107                              | <b>1.753</b>                           | 5.076                  | <b>1.616</b>             | -22.33                   |
| 372 | -37.4072     | -12.4232     | 0.047                                 | <b>0.045</b>                        | 0.046                               | 0.629                          | 0.735                             | 0.00063                              | 0.128                           | 0.134                              | <b>0.759</b>                           | 3.102                  | <b>0.987</b>             | -23.88                   |
| 373 | -37.3786     | -12.4690     | 0.144                                 | <b>0.141</b>                        | 0.142                               | 2.184                          | 2.369                             | 0.00161                              | 0.335                           | 0.347                              | <b>2.524</b>                           | 5.763                  | <b>1.834</b>             | -16.06                   |
| 374 | -37.7940     | -12.7069     | 0.186                                 | <b>0.185</b>                        | 0.186                               | 3.249                          | 3.365                             | 0.00045                              | 0.116                           | 0.119                              | <b>3.371</b>                           | 6.652                  | <b>2.117</b>             | -29.65                   |
| 375 | -37.7714     | -12.7838     | 1.841                                 | <b>1.820</b>                        | 1.830                               | 9.337                          | 10.756                            | 0.01052                              | 0.779                           | 0.839                              | <b>10.134</b>                          | 12.473                 | <b>3.970</b>             | -22.80                   |
| 376 | -37.7475     | -12.7684     | 0.612                                 | <b>0.610</b>                        | 0.611                               | 4.843                          | 5.516                             | 0.00128                              | 0.160                           | 0.176                              | <b>5.013</b>                           | 9.383                  | <b>2.987</b>             | -24.21                   |
| 377 | -37.7662     | -12.9755     | 0.097                                 | <b>0.096</b>                        | 0.097                               | 3.062                          | 3.115                             | 0.00023                              | 0.091                           | 0.094                              | <b>3.158</b>                           | 6.858                  | <b>2.183</b>             | -39.00                   |
| 378 | -37.4315     | -11.9400     | 0.599                                 | <b>0.597</b>                        | 0.598                               | 5.195                          | 5.591                             | 0.00120                              | 0.137                           | 0.149                              | <b>5.346</b>                           | 8.83                   | <b>2.811</b>             | -34.68                   |
| 379 | -37.4501     | -11.9460     | 0.255                                 | <b>0.254</b>                        | 0.254                               | 2.842                          | 3.042                             | 0.00059                              | 0.093                           | 0.098                              | <b>2.942</b>                           | 6.461                  | <b>2.057</b>             | -33.27                   |
| 380 | -37.4482     | -12.0768     | 0.070                                 | <b>0.070</b>                        | 0.070                               | 1.061                          | 1.182                             | 0.00022                              | 0.053                           | 0.057                              | <b>1.117</b>                           | 3.798                  | <b>1.209</b>             | -26.77                   |
| 381 | -37.4540     | -12.0531     | 0.980                                 | <b>0.970</b>                        | 0.975                               | 5.840                          | 6.616                             | 0.00507                              | 0.360                           | 0.398                              | <b>6.216</b>                           | 8.977                  | <b>2.857</b>             | -25.98                   |
| 382 | -37.4981     | -12.2625     | 0.127                                 | <b>0.126</b>                        | 0.126                               | 3.104                          | 3.219                             | 0.00070                              | 0.175                           | 0.181                              | <b>3.287</b>                           | 6.624                  | <b>2.108</b>             | -28.25                   |
| 383 | -37.5363     | -13.1333     | 0.061                                 | <b>0.060</b>                        | 0.061                               | 1.087                          | 1.166                             | 0.00024                              | 0.031                           | 0.038                              | <b>1.120</b>                           | 3.822                  | <b>1.217</b>             | -39.75                   |
| 384 | -37.5439     | -13.0770     | 0.018                                 | <b>0.018</b>                        | 0.018                               | 0.542                          | 0.575                             | 0.00031                              | 0.084                           | 0.086                              | <b>0.627</b>                           | 2.836                  | <b>0.903</b>             | -31.91                   |
| 385 | -37.5940     | -13.1952     | 0.051                                 | <b>0.051</b>                        | 0.051                               | 0.995                          | 1.051                             | 0.00015                              | 0.049                           | 0.051                              | <b>1.046</b>                           | 3.664                  | <b>1.166</b>             | -35.92                   |
| 386 | -37.6226     | -13.1114     | 0.075                                 | <b>0.075</b>                        | 0.075                               | 2.531                          | 2.599                             | 0.00045                              | 0.222                           | 0.225                              | <b>2.758</b>                           | 7.231                  | <b>2.302</b>             | -37.92                   |
| 387 | -37.6359     | -12.9259     | 0.033                                 | <b>0.032</b>                        | 0.032                               | 0.730                          | 0.790                             | 0.00017                              | 0.044                           | 0.046                              | <b>0.775</b>                           | 3.283                  | <b>1.045</b>             | -32.13                   |
| 388 | -37.1697     | -13.0489     | 0.616                                 | <b>0.611</b>                        | 0.614                               | 5.330                          | 5.993                             | 0.00221                              | 0.266                           | 0.284                              | <b>5.604</b>                           | 10.976                 | <b>3.494</b>             | -32.95                   |
| 389 | -37.0476     | -13.1175     | 0.311                                 | <b>0.307</b>                        | 0.309                               | 2.761                          | 3.168                             | 0.00197                              | 0.253                           | 0.272                              | <b>3.018</b>                           | 7.102                  | <b>2.261</b>             | -25.81                   |
| 390 | -37.0308     | -13.0788     | 0.322                                 | <b>0.306</b>                        | 0.314                               | 3.782                          | 4.145                             | 0.00810                              | 0.543                           | 0.572                              | <b>4.331</b>                           | 8.187                  | <b>2.606</b>             | -24.52                   |
| 391 | -37.1181     | -13.1135     | 0.142                                 | <b>0.142</b>                        | 0.142                               | 1.524                          | 1.686                             | 0.00007                              | 0.027                           | 0.028                              | <b>1.901</b>                           | 4.937                  | <b>1.571</b>             | -28.22                   |
| 392 | -37.1051     | -13.1128     | 0.170                                 | <b>0.167</b>                        | 0.169                               | 2.185                          | 2.438                             | 0.00107                              | 0.208                           | 0.217                              | <b>2.397</b>                           | 6.141                  | <b>1.955</b>             | -27.71                   |
| 393 | -37.0629     | -13.1458     | 0.199                                 | <b>0.194</b>                        | 0.197                               | 2.301                          | 2.598                             | 0.00247                              | 0.227                           | 0.257                              | <b>2.532</b>                           | 6.128                  | <b>1.951</b>             | -30.12                   |
| 394 | -37.1599     | -12.7293     | 0.488                                 | <b>0.488</b>                        | 0.488                               | 3.706                          | 4.213                             | 0.00020                              | 0.056                           | 0.061                              | <b>3.768</b>                           | 7.89                   | <b>2.511</b>             | -23.09                   |

Supplementary Table 1 continued..

| #   | Lat<br>[DDD] | Lon<br>[DDD] | Total<br>volume<br>[km <sup>3</sup> ] | Net<br>volume<br>[km <sup>3</sup> ] | Cut<br>volume<br>[km <sup>3</sup> ] | Cut area<br>[km <sup>2</sup> ] | Cut area<br>3D [km <sup>2</sup> ] | Fill<br>volume<br>[km <sup>3</sup> ] | Fill area<br>[km <sup>2</sup> ] | Fill area<br>3D [km <sup>2</sup> ] | Enclosed<br>area<br>[km <sup>2</sup> ] | Peri-<br>meter<br>[km] | Mean<br>diameter<br>[km] | Back-<br>scatter<br>[dB] |
|-----|--------------|--------------|---------------------------------------|-------------------------------------|-------------------------------------|--------------------------------|-----------------------------------|--------------------------------------|---------------------------------|------------------------------------|----------------------------------------|------------------------|--------------------------|--------------------------|
| 395 | -37.1508     | -12.6397     | 0.421                                 | <b>0.420</b>                        | 0.421                               | 4.167                          | 4.753                             | 0.00058                              | 0.111                           | 0.125                              | <b>4.285</b>                           | 9.089                  | <b>2.893</b>             | -27.94                   |
| 396 | -37.1845     | -12.6433     | 0.417                                 | <b>0.408</b>                        | 0.412                               | 3.727                          | 4.254                             | 0.00452                              | 0.403                           | 0.439                              | <b>4.138</b>                           | 7.655                  | <b>2.437</b>             | -25.67                   |
| 397 | -37.2045     | -12.6980     | 0.538                                 | <b>0.538</b>                        | 0.538                               | 3.632                          | 4.154                             | 0.00032                              | 0.064                           | 0.070                              | <b>3.702</b>                           | 7.435                  | <b>2.367</b>             | -22.63                   |
| 398 | -37.2727     | -12.4336     | 0.043                                 | <b>0.042</b>                        | 0.043                               | 0.828                          | 0.895                             | 0.00034                              | 0.075                           | 0.079                              | <b>0.905</b>                           | 3.424                  | <b>1.090</b>             | -28.76                   |
| 399 | -37.2620     | -12.4440     | 0.093                                 | <b>0.093</b>                        | 0.093                               | 1.160                          | 1.297                             | 0.00004                              | 0.013                           | 0.014                              | <b>1.176</b>                           | 4.069                  | <b>1.295</b>             | -22.75                   |
| 400 | -37.3027     | -12.4604     | 0.067                                 | <b>0.065</b>                        | 0.066                               | 0.943                          | 1.075                             | 0.00069                              | 0.206                           | 0.216                              | <b>1.152</b>                           | 3.886                  | <b>1.237</b>             | -26.06                   |
| 401 | -37.3111     | -12.4552     | 0.068                                 | <b>0.068</b>                        | 0.068                               | 1.184                          | 1.277                             | 0.00000                              | 0.007                           | 0.007                              | <b>1.193</b>                           | 3.942                  | <b>1.255</b>             | -29.01                   |
| 402 | -37.2958     | -12.4740     | 0.334                                 | <b>0.331</b>                        | 0.333                               | 3.613                          | 4.047                             | 0.00154                              | 0.226                           | 0.237                              | <b>3.846</b>                           | 7.841                  | <b>2.496</b>             | -21.48                   |
| 403 | -37.3120     | -12.4049     | 0.094                                 | <b>0.079</b>                        | 0.087                               | 1.274                          | 1.429                             | 0.00742                              | 0.459                           | 0.502                              | <b>1.736</b>                           | 4.871                  | <b>1.550</b>             | -21.34                   |
| 404 | -37.3018     | -12.3874     | 0.051                                 | <b>0.048</b>                        | 0.050                               | 1.013                          | 1.109                             | 0.00139                              | 0.181                           | 0.195                              | <b>1.197</b>                           | 4.156                  | <b>1.323</b>             | -24.34                   |
| 405 | -37.3607     | -12.2917     | 0.126                                 | <b>0.125</b>                        | 0.125                               | 1.387                          | 1.560                             | 0.00018                              | 0.039                           | 0.041                              | <b>1.429</b>                           | 4.298                  | <b>1.368</b>             | -22.42                   |
| 406 | -37.3161     | -12.2221     | 0.075                                 | <b>0.075</b>                        | 0.075                               | 1.281                          | 1.406                             | 0.00011                              | 0.055                           | 0.056                              | <b>1.339</b>                           | 4.621                  | <b>1.471</b>             | -27.88                   |
| 407 | -37.3150     | -12.0317     | 0.038                                 | <b>0.038</b>                        | 0.038                               | 0.744                          | 0.804                             | 0.00013                              | 0.045                           | 0.046                              | <b>0.791</b>                           | 3.172                  | <b>1.010</b>             | -33.85                   |
| 408 | -37.4234     | -12.0512     | 0.394                                 | <b>0.380</b>                        | 0.387                               | 4.356                          | 4.620                             | 0.00664                              | 0.538                           | 0.574                              | <b>4.906</b>                           | 7.99                   | <b>2.543</b>             | -32.42                   |
| 409 | -37.4062     | -12.0097     | 0.624                                 | <b>0.618</b>                        | 0.621                               | 4.959                          | 5.448                             | 0.00283                              | 0.370                           | 0.389                              | <b>5.342</b>                           | 8.368                  | <b>2.664</b>             | -34.46                   |
| 410 | -37.4370     | -11.9992     | 0.040                                 | <b>0.039</b>                        | 0.040                               | 0.672                          | 0.755                             | 0.00033                              | 0.046                           | 0.053                              | <b>0.720</b>                           | 3.039                  | <b>0.967</b>             | -30.91                   |
| 411 | -37.6992     | -12.2630     | 0.041                                 | <b>0.040</b>                        | 0.040                               | 0.926                          | 0.953                             | 0.00022                              | 0.050                           | 0.051                              | <b>0.978</b>                           | 3.562                  | <b>1.134</b>             | -34.90                   |
| 412 | -37.4188     | -12.8577     | 0.242                                 | <b>0.241</b>                        | 0.241                               | 3.601                          | 3.718                             | 0.00034                              | 0.096                           | 0.099                              | <b>3.702</b>                           | 7.089                  | <b>2.256</b>             | -33.07                   |
| 413 | -37.4158     | -12.9974     | 0.162                                 | <b>0.162</b>                        | 0.162                               | 2.143                          | 2.355                             | 0.00042                              | 0.130                           | 0.134                              | <b>2.277</b>                           | 6.107                  | <b>1.944</b>             | -29.24                   |
| 414 | -37.4137     | -12.8851     | 0.034                                 | <b>0.033</b>                        | 0.034                               | 0.781                          | 0.831                             | 0.00012                              | 0.050                           | 0.052                              | <b>0.832</b>                           | 3.284                  | <b>1.045</b>             | -34.49                   |
| 415 | -37.4401     | -12.9062     | 0.083                                 | <b>0.081</b>                        | 0.082                               | 1.459                          | 1.600                             | 0.00093                              | 0.151                           | 0.168                              | <b>1.613</b>                           | 4.729                  | <b>1.505</b>             | -29.79                   |
| 416 | -37.4432     | -13.0464     | 0.434                                 | <b>0.431</b>                        | 0.432                               | 3.640                          | 4.064                             | 0.00180                              | 0.184                           | 0.204                              | <b>3.829</b>                           | 7.241                  | <b>2.305</b>             | -26.62                   |
| 417 | -37.3020     | -12.9332     | 0.070                                 | <b>0.069</b>                        | 0.069                               | 1.058                          | 1.172                             | 0.00006                              | 0.029                           | 0.030                              | <b>1.089</b>                           | 3.844                  | <b>1.224</b>             | -24.09                   |
| 418 | -37.4382     | -12.7506     | 0.034                                 | <b>0.033</b>                        | 0.033                               | 0.600                          | 0.680                             | 0.00015                              | 0.078                           | 0.079                              | <b>0.678</b>                           | 2.968                  | <b>0.945</b>             | -26.90                   |
| 419 | -37.4265     | -12.8198     | 0.041                                 | <b>0.041</b>                        | 0.041                               | 0.655                          | 0.728                             | 0.00003                              | 0.024                           | 0.025                              | <b>0.681</b>                           | 2.948                  | <b>0.938</b>             | -23.13                   |
| 420 | -37.4433     | -12.8053     | 0.025                                 | <b>0.024</b>                        | 0.024                               | 0.615                          | 0.666                             | 0.00027                              | 0.047                           | 0.051                              | <b>0.663</b>                           | 3.096                  | <b>0.985</b>             | -26.06                   |
| 421 | -37.5036     | -12.9415     | 0.030                                 | <b>0.030</b>                        | 0.030                               | 0.876                          | 0.900                             | 0.00003                              | 0.028                           | 0.029                              | <b>0.906</b>                           | 3.451                  | <b>1.098</b>             | -39.61                   |
| 422 | -37.8040     | -13.7410     | 0.024                                 | <b>0.024</b>                        | 0.024                               | 0.992                          | 1.005                             | 0.00003                              | 0.020                           | 0.021                              | <b>1.013</b>                           | 3.61                   | <b>1.149</b>             | -40.62                   |



Supplementary Table 1 continued..

| #   | Lat<br>[DDD] | Lon<br>[DDD] | Total<br>volume<br>[km <sup>3</sup> ] | Net<br>volume<br>[km <sup>3</sup> ] | Cut<br>volume<br>[km <sup>3</sup> ] | Cut area<br>[km <sup>2</sup> ] | Cut area<br>3D [km <sup>2</sup> ] | Fill<br>volume<br>[km <sup>3</sup> ] | Fill area<br>[km <sup>2</sup> ] | Fill area<br>3D [km <sup>2</sup> ] | Enclosed<br>area<br>[km <sup>2</sup> ] | Peri-<br>meter<br>[km] | Mean<br>diameter<br>[km] | Back-<br>scatter<br>[dB] |
|-----|--------------|--------------|---------------------------------------|-------------------------------------|-------------------------------------|--------------------------------|-----------------------------------|--------------------------------------|---------------------------------|------------------------------------|----------------------------------------|------------------------|--------------------------|--------------------------|
| 423 | -37.7808     | -13.6533     | 0.147                                 | <b>0.144</b>                        | 0.145                               | 2.693                          | 2.817                             | 0.00112                              | 0.224                           | 0.228                              | <b>2.921</b>                           | 6.199                  | <b>1.973</b>             | -29.84                   |
| 424 | -37.2316     | -12.4114     | 0.050                                 | <b>0.049</b>                        | 0.050                               | 0.782                          | 0.864                             | 0.00044                              | 0.102                           | 0.105                              | <b>0.885</b>                           | 3.376                  | <b>1.075</b>             | -28.48                   |
| 425 | -37.2386     | -12.4324     | 0.053                                 | <b>0.053</b>                        | 0.053                               | 1.025                          | 1.103                             | 0.00022                              | 0.064                           | 0.067                              | <b>1.092</b>                           | 3.732                  | <b>1.188</b>             | -24.79                   |
| 426 | -37.2440     | -12.4169     | 0.232                                 | <b>0.226</b>                        | 0.229                               | 4.116                          | 4.197                             | 0.00305                              | 0.438                           | 0.451                              | <b>4.563</b>                           | 7.811                  | <b>2.486</b>             | -27.81                   |
| 427 | -37.0490     | -12.8302     | 0.094                                 | <b>0.094</b>                        | 0.094                               | 1.613                          | 1.693                             | 0.00004                              | 0.026                           | 0.027                              | <b>1.642</b>                           | 4.871                  | <b>1.550</b>             | -28.07                   |
| 428 | -37.1898     | -12.9897     | 0.207                                 | <b>0.206</b>                        | 0.206                               | 1.997                          | 2.203                             | 0.00055                              | 0.138                           | 0.140                              | <b>2.138</b>                           | 5.237                  | <b>1.667</b>             | -33.34                   |
| 429 | -37.0059     | -13.2165     | 0.264                                 | <b>0.264</b>                        | 0.264                               | 2.478                          | 2.831                             | 0.00021                              | 0.057                           | 0.061                              | <b>2.538</b>                           | 6.746                  | <b>2.147</b>             | -31.59                   |
| 430 | -37.0389     | -13.2739     | 0.307                                 | <b>0.305</b>                        | 0.306                               | 2.586                          | 2.893                             | 0.00088                              | 0.108                           | 0.121                              | <b>2.698</b>                           | 5.966                  | <b>1.899</b>             | -27.80                   |

**Supplementary Table 2:** Decision table summarizing the factors used in the structural Benthic Terrain Model classification (modified after Erdey-Heydorn<sup>4</sup>). The Bathymetric Position Index (BPI) values are given in grid units (standardised value of each data point was multiplied by 100) and represent  $\pm 1$  standard deviation. Slope values are given in degrees. For a better visualization, some of the structural zones are grouped together in the final map.

| Class | Zone                                            | Lower limit<br>Broad BPI | Upper limit<br>Broad BPI | Lower limit<br>Fine BPI | Upper limit<br>Fine BPI | Lower limit<br>Slope | Upper limit<br>Slope |
|-------|-------------------------------------------------|--------------------------|--------------------------|-------------------------|-------------------------|----------------------|----------------------|
| 1     | Flat Plains                                     | -100                     | 100                      | -100                    | 100                     |                      | 3                    |
| 2     | Broad Slopes                                    | -100                     | 100                      | -100                    | 100                     | 3                    | 25                   |
| 3     | Steep Slopes                                    | -100                     | 100                      | -100                    | 100                     | 25                   |                      |
| 4     | Broad Depression                                |                          | -100                     | -100                    | 100                     |                      | 3                    |
| 5     | Narrow Depression                               |                          | -100                     |                         | -100                    |                      | 3                    |
| 6     | Local Ridge, Boulders, Pinnacles in Depression  |                          | -100                     | 100                     |                         |                      |                      |
| 7     | Crevices, Narrow Gullies over elevated terrain  | 100                      |                          |                         | -100                    |                      |                      |
| 8     | Flat Ridge Tops                                 | 100                      |                          | -100                    | 100                     |                      | 3                    |
| 9     | Broad Slopes on Elevated Terrain                | 100                      |                          | -100                    | 100                     | 3                    | 25                   |
| 10    | Steep Slopes on Elevated Terrain                | 100                      |                          | -100                    | 100                     | 25                   |                      |
| 11    | Rock Outcrop High, Narrow Ridge                 | 100                      |                          | 100                     |                         |                      |                      |
| 12    | Scarp, Cliff                                    | -100                     | 100                      |                         | -100                    | 3                    |                      |
| 13    | Local Ridge, Boulders, Pinnacles on Broad Flats | -100                     | 100                      | 100                     |                         |                      | 3                    |
| 14    | Local Ridge, Boulders, Pinnacles on Slopes      | -100                     | 100                      | 100                     |                         | 3                    |                      |
| 15    | Local Depression, Current Scours                | -100                     | 100                      |                         | -100                    |                      |                      |
| 16    | Broad Slopes in Broad Depressions               |                          | -100                     | -100                    | 100                     | 3                    | 25                   |
| 17    | Steep Slopes in Broad Depressions               |                          | -100                     | -100                    | 100                     | 25                   |                      |
| 18    | Broad Slopes in Narrow Depressions              |                          | -100                     |                         | -100                    | 3                    | 25                   |
| 19    | Steep Slopes in Narrow Depressions              |                          | -100                     |                         | -100                    | 25                   |                      |

## Supplementary Notes

**Supplementary Note 1 | Combined backscatter mosaic.** A combined backscatter mosaic is presented, retrieved from two different cruises, both acquired with MBES of R/V MARIA S. MERIAN. In order to estimate errors when combining these data sets, we considered the following issues and excluded the backscatter data recorded from the EM1002 around Nightingale Island, due to different transducer geometry and frequency.

Seafloor acoustic reflectivities were recorded from the same vessel but during different cruises within 15 months during which time the MBES EM120 system was updated to EM122. According to Kongsberg's service report, the update in September/October 2012 saw the addition of two new transmit arrays and an upgrade of the MRU Seapath 300 to 320. The arrays and the MRU were installed at the same positions as their predecessors. Kongsberg Support stated, as expected, that the updates could lead to slight improvements in radiometric resolution due to better shaping of the TX (transmit) pulse on EM122.

Processing corrections for the two systems EM120 and EM122 are based on algorithms developed at the end of the last century, as described in more detail in Hammerstad<sup>6</sup>. Schimel et al.<sup>7</sup> mention that the manufacturer ensures normalization of the signal level during acquisition, most likely to a level that enables comparability of results with those of other Kongsberg systems. Examination of areas of overlap between the two surveys enabled us to calculate an average offset of about -2 dB between the EM122 and the EM120 datasets (Supplementary Figure 6).

The original histogram of differences between backscatter values in the overlap area is plotted in the lower right corner of Supplementary Figure 6. It reveals two distributions, a Gaussian normal distribution around 0 dB and a distribution with a positive skew (large tail to the right). The skewed distribution results from the aforementioned -2 dB shift. The histogram in the upper-right corner of Supplementary Figure 6 shows the distribution of differences after correction for this offset. The remaining Gaussian normal distribution is a result of a lateral displacement between the cruises of about 1-1.5 times the beam footprint of the 2° x 2° transmit array. Since this displacement seems related to the acquisition geometry, we assume that it occurs due to the absence of a Doppler effect correction in the EM120 data. This affects the outer range of the swath most strongly.

Further acoustic reflectivity differences can be related to heading effects, spherical spreading, frequency-dependent attenuation and level variation with angle of incidence at the seafloor.

These issues are, for most purposes, well corrected for in the Kongsberg MBES backscatter by the manufacturer by applying a rather complex dynamic gain and corrections, albeit based on simple models described in the guidelines and recommendations of the GeoHab Backscatter Working Group<sup>8,9</sup>. Ongoing investigations<sup>10-12</sup> of some of the remaining errors will probably only be solved after calibration with ground truth or additional calibrated acoustic devices.

Wherever possible, we try to avoid using near-nadir information, which are most likely influenced by direct reflection and therefore oversaturated. This is made possible using a processing feature of QPS Fledermaus FMGT<sup>TM</sup>.

We decided to use backscatter dB values instead of a commonly used grey scale range and a color-coded classification instead of an unclassified grey scale. We found the transformation of backscatter [dB] values from normalized and TX/RX gain corrected systems like EM120 and EM122 to a graphical greyscale range of 0-254 values to be insufficient for our purposes. Instead, we utilized ESRI's *ArcGIS*<sup>TM</sup> image classification tool for supervised classification based on natural breaks in the backscatter mosaic histogram to generate a classified mosaic image. The color-coded results emphasize the different backscatter dB-ranges regardless of area covered, enhancing their visibility to the human eye. Several other publications deal with seabed backscatter in a similar way, e.g. Eason et al.<sup>13</sup>.

Finally, yet importantly, we are aware of a certain penetration of the 12 kHz signal of the EM120/122 MBES depending on grain size and water saturation of the topmost seafloor sediments. This topic is the focus of ongoing research at the Seafloor Mapping and Imaging Group and the Marine Technology – Environmental Research Group at MARUM/University of Bremen. Based on comparison with ground-truthed data sets from the North Pond, Lucky Strike, and Azores areas in the North Atlantic, where water depth and volcanic background are similar to the Tristan da Cunha region, we expect penetration by about 1 m within coarser sandy sediments and about 2 m or more into fine-grained and pelagic sediments, depending on water saturation. In comparison to this, bedrock or volcanic outcrop, boulders, pebbles, and rubble create a much different angular independence and support strong backscatter in every direction. They usually correlate nicely with higher roughness values as derived from bathymetry.

Based on this, those unusual areas of relatively high backscatter intensity but relatively inconspicuous roughness values from low frequency MBES like the 12 kHz EM120/EM122 are of particular interest. In areas like this, it seems to be possible to identify sediment-draped gas and hydrate pockets, mudflows and lava flows.

### Supplementary References

1. Geissler, W. H., Wintersteller, P., Strack, A., Kammann, J., Jegen, M., Marcia, M., Schloemer, A. & Jokat, W. GIS based analysis, processed sub bottom profiler, and composite grid and backscatter mosaics around Tristan da Cunha. PANGAEA, <https://doi.pangaea.de/10.1594/PANGAEA.906154> (unpublished dataset) (2019).
2. Jenness, J. S. Calculating landscape surface area from digital elevation models. *Wildlife Society Bulletin* **32(3)**, 829-839 (2004)
3. Ryan, W. B. F., Carbotte, S. M., Coplan, J. O., O'Hara, S., Melkonian, A., Arko, R., Weissel, R. A., Ferrini, V., Goodwillie, A., Nitsche, F., Bonczkowski, J. & Zemsky, R. Global Multi-Resolution Topography (GMRT) synthesis. *Geochemistry, Geophysics, Geosystems* **10(3)**, doi:10.1029/2008GC002332 (2009).
4. Smith, W. H. F. & Sandwell, D. T. Global Sea Floor Topography from Satellite Altimetry and Ship Depth Soundings. *Science* **277(5334)**, 1956-1962, doi: 10.1126/science.277.5334.1956 (1997).
5. Erdey-Heydorn, M. D. An ArcGIS Seabed Characterization Toolbox Developed for Investigating Benthic Habitats. *Marine Geodesy* **31(4)**, 318–358, doi: 10.1080/01490410802466819 (2008).
6. Hammerstad, E. EM technical note: Backscattering and seabed image reflectivity. Horten, Norway: Kongsberg Maritime AS (2000).
7. Schimel, A. C. G., Beaudoin, J., Gaillot, A., Keith, G., Le Bas, T., Parnum, I. & Schmidt, V. Processing backscatter data: from datagrams to Angular responses and mosaics. In: Lurton, X., Lamarche, G. (Eds.) Backscatter measurements by seafloor-mapping sonars. Guidelines and Recommendations. A collective report by members of the GeoHab Backscatter Working Group. Geohab Report. 150p. Chap.6 pp.133-164 (2015).
8. Lurton, X. & Lamarche, G. (Eds.) Backscatter measurements by seafloor-mapping sonars; Guidelines and Recommendations. A collective report by

members of the GeoHab Backscatter Working Group

[https://niwa.co.nz/static/BWSG\\_REPORT\\_MAY2015\\_web.pdf](https://niwa.co.nz/static/BWSG_REPORT_MAY2015_web.pdf) (2015).

9. Schimel, A.C.G.,-Beaudoin, J., Parnum, I.M., Le Bas T., Schmidt, V., Keith, G. & Ierodionou, D. Multibeam sonar backscatter data processing. *Marine Geophysical Researches* **39**, 121-137, doi: 10.1007/s11001-018-9341-z (2018).
10. Ladroit, Y., Lamarche, G. & Pallentin, A. Seafloor multibeam backscatter calibration experiment: comparing 45°-tilted 38-kHz split-beam echosounder and 30-kHz multibeam data. *Marine Geophysical Researches* **39**, 41-53, doi: 10.1007/s11001-017-9340-5 (2018).
11. Lamarche, G. & Lurton, X. Recommendations for improved and coherent acquisition and processing of backscatter data from seafloor-mapping sonars. *Marine Geophysical Researches* **39**, 5-22. doi: 10.1007/s11001-017-9315-6 (2018).
12. Malik, M., Schimel, A. C. G., Masetti, G., Roche, M., Le Deunf, J., Dolan, M. F., Beaudoin, J., Augustin, J.-M., Hamilton, T. & Parnum, I. Results from the First Phase of the Seafloor Backscatter Processing Software Inter-Comparison Project. *Geosciences* **9**, 516 (2019).
13. Eason, D. E., Dunn, R. A., Canales, J. P. & Sohn, R. A. Segment-scale variations in seafloor volcanic and tectonic processes from multibeam sonar imaging, Mid-Atlantic Ridge Rainbow region (35°45'–36°35'N). *Geochemistry, Geophysics, Geosystems* **17**, 3560– 3579, doi: 10.1002/2016GC006433 (2016).
